## Coordinated interactions between endothelial cells and macrophages in the islet microenvironment promote $\beta$ cell regeneration

Diane C. Saunders<sup>1,2\*</sup>, Kristie I. Aamodt<sup>1\*</sup>, Tiffany M. Richardson<sup>1</sup>, Alec Hopkirk<sup>2</sup>, Radhika Aramandla<sup>2</sup>, Greg Poffenberger<sup>2</sup>, Regina Jenkins<sup>2</sup>, David K. Flaherty<sup>3</sup>, Nripesh Prasad<sup>4</sup>, Sean E. Levy<sup>4</sup>, Alvin C. Powers<sup>1,2,5</sup>, and Marcela Brissova<sup>2</sup>

\*D.C.S. and \*K.I.A. contributed equally to this work.

<sup>1</sup>Department of Molecular Physiology & Biophysics, Vanderbilt University, Nashville, TN

<sup>2</sup>Department of Medicine, Division of Diabetes, Endocrinology, and Metabolism, Vanderbilt University Medical Center, Nashville, TN

<sup>3</sup>Flow Cytometry Shared Resource, Vanderbilt University Medical Center, Nashville, TN 37232, USA

<sup>4</sup>Hudson Alpha Institute of Biotechnology, Huntsville, AL

<sup>5</sup>VA Tennessee Valley Healthcare, Nashville, TN

### Address correspondence to:

Marcela Brissova  
Vanderbilt University Medical Center  
7465 MRB IV  
2215 Garland Avenue  
Nashville, TN 37232-0475  
marcela.brissova@vumc.org  
(615) 936-7678

Alvin C. Powers  
Vanderbilt University Medical Center  
7465 MRB IV  
2215 Garland Avenue  
Nashville, TN 37232-0475  
al.powers@vumc.org  
(615) 936-7678

## ABSTRACT

1 Endogenous  $\beta$  cell regeneration could alleviate diabetes, but proliferative stimuli within the islet  
2 microenvironment are incompletely understood. We previously found that  $\beta$  cell recovery  
3 following hypervascularization-induced  $\beta$  cell loss involves interactions with endothelial cells  
4 (ECs) and macrophages (M $\Phi$ s). Here we show that proliferative ECs modulate M $\Phi$  infiltration  
5 and phenotype during  $\beta$  cell loss, and recruited M $\Phi$ s are essential for  $\beta$  cell recovery.  
6 Furthermore, VEGFR2 inactivation in quiescent ECs accelerates islet vascular regression  
7 during  $\beta$  cell recovery and leads to increased  $\beta$  cell proliferation without changes in M $\Phi$   
8 phenotype or number. Transcriptome analysis of  $\beta$  cells, ECs, and M $\Phi$ s reveals that  $\beta$  cell  
9 proliferation coincides with elevated expression of extracellular matrix remodeling molecules  
10 and growth factors likely driving activation of proliferative signaling pathways in  $\beta$  cells.  
11 Collectively, these findings suggest a new  $\beta$  cell regeneration paradigm whereby coordinated  
12 interactions between intra-islet M $\Phi$ s, ECs, and extracellular matrix mediate  $\beta$  cell self-renewal.

## INTRODUCTION

13 While investigating how vascular endothelial growth factor-A (VEGF-A) regulates islet  
14 vascularization, our group previously characterized a mouse model in which signals from the  
15 local microenvironment stimulate  $\beta$  cell self-renewal<sup>1</sup>. In this model, transiently increasing  
16 VEGF-A production in  $\beta$  cells ( $\beta$ VEGF-A) induces endothelial cell (EC) expansion and  
17 hypervascularization that causes  $\beta$  cell loss; remarkably, islet morphology, capillary network,  $\beta$   
18 cell mass, and function normalize 6 weeks after withdrawal (WD) of the VEGF-A stimulus. This  
19 regenerative response is a result of a transient but robust burst in  $\beta$  cell proliferation, which is  
20 dependent on VEGF-A-mediated recruitment of macrophages (M $\Phi$ s). These recruited cells  
21 express markers of both pro-inflammatory (M1) and restorative (M2) activation, suggesting a  
22 unique regenerative phenotype<sup>1-5</sup>. Further investigation into the role of various  
23 microenvironmental components on  $\beta$  cell proliferation in this model is needed given that this  
24 regenerative microenvironment promotes proliferation of human in addition to mouse  $\beta$  cells<sup>1</sup>.  
25 M $\Phi$ s are often perceived as damaging to islets due to their role in  $\beta$  cell loss during diabetes<sup>6-8</sup>,  
26 but it is becoming increasingly appreciated that tissue-resident M $\Phi$ s play important roles in  
27 immune surveillance and tissue homeostasis and function in the islet. Mice with compromised  
28 M $\Phi$  populations during pancreatic development exhibit reduced  $\beta$  cell proliferation,  $\beta$  cell mass,

29 and impaired islet morphogenesis<sup>9,10</sup>. Furthermore, recent studies have supported the notion  
30 that MΦs contribute to β cell regeneration after several types of injury, including surgically  
31 induced pancreatitis<sup>11</sup> and diphtheria toxin (DT)-mediated apoptosis<sup>12</sup>. This recent work  
32 highlights the importance of understanding how MΦs contribute to β cell proliferation and further  
33 defining MΦ phenotype and function in the βVEGF-A model.

34 In addition to MΦs, ECs are known to participate in tissue repair via activation of the VEGF-A–  
35 VEGFR2 pathway, which mediates angiocrine factor production and promotes local cell renewal  
36 and regeneration<sup>13–16</sup>. There is a precedent for ECs facilitating tissue repair by influencing MΦ  
37 activation toward a restorative, M2-like phenotype<sup>4</sup>. Because vasculature is essential for normal  
38 islet function, understanding signals that govern EC homeostasis and the effects of ECs on  
39 neighboring cell populations is crucial for maintaining and restoring islet health. Signaling  
40 between ECs and the pancreatic epithelium is critical for establishing islet vasculature and β cell  
41 mass during development, and in mature islets ongoing signaling between endocrine and ECs  
42 is required to maintain the capillary network through which endocrine cells receive adequate  
43 nutrition and oxygen and can rapidly sense and secrete hormones<sup>17–19</sup>. The vascular basement  
44 membrane is also the primary component of the intra-islet extracellular matrix (ECM) and acts  
45 as a reservoir for growth factors and other signaling molecules important for β cell  
46 differentiation, function, and proliferation<sup>20–23</sup>. In the βVEGF-A model, ECs may affect the  
47 regenerative process indirectly by promoting MΦ recruitment and activation, altering ECM  
48 composition and signaling, and/or by directly influencing β cell proliferation.

49 Here we deconstructed the complex *in vivo* islet microenvironment in the βVEGF-A model and  
50 show that β cell self-renewal is mediated by coordinated interactions between recruited MΦs,  
51 intra-islet ECs, and the ECM (**Figures 1, S1**). To isolate the roles of MΦs and ECs in this model  
52 we removed MΦs from the islet microenvironment (**Figures 1, S1**; experimental scheme **A**) and  
53 inactivated VEGFR2 signaling in ECs to discern the effects of proliferative or quiescent ECs on  
54 β cell proliferation (**Figures 1, S1**; experimental schemes **B** and **C**). Since the βVEGF-A islet  
55 microenvironment is a complex *in vivo* system involving dynamic changes in islet cell  
56 composition, we also identified regenerative signals by performing transcriptome analysis  
57 (**Figures 1, S1**; experimental scheme **D**) of purified islet cell populations including β cells, ECs,  
58 and MΦs over the course of β cell loss and recovery. Based on previous work<sup>1,16</sup> we predicted  
59 that either MΦ depletion (clodronate) or loss of VEGFR2 signaling in ECs would perturb MΦ  
60 recruitment and polarization and impair β cell regeneration. Indeed, we found that MΦ depletion  
61 suppressed the transient burst in β cell proliferation leading to reduced recovery of β cell mass.

62 In addition, VEGFR2-mediated signaling in intra-islet ECs was necessary for maximal MΦ  
 63 recruitment and M2-like phenotype activation. Surprisingly, VEGFR2 ablation in quiescent ECs  
 64 during the period of β cell recovery accelerated islet vascular regression leading to increased β  
 65 cell proliferation while MΦ phenotype and number was unchanged. Transcriptome analysis  
 66 during β cell death and recovery revealed intricate changes in expression of growth factors,  
 67 integrins, and matrix remodeling enzymes in all three cell types, suggesting that ECM  
 68 remodeling and activation of ECM-associated molecules within the islet microenvironment play  
 69 critical roles in β cell self-renewal. Taken together, our results indicate that both MΦs and intra-  
 70 islet ECs provide crucial microenvironmental cues to cooperatively promote β cell regeneration.

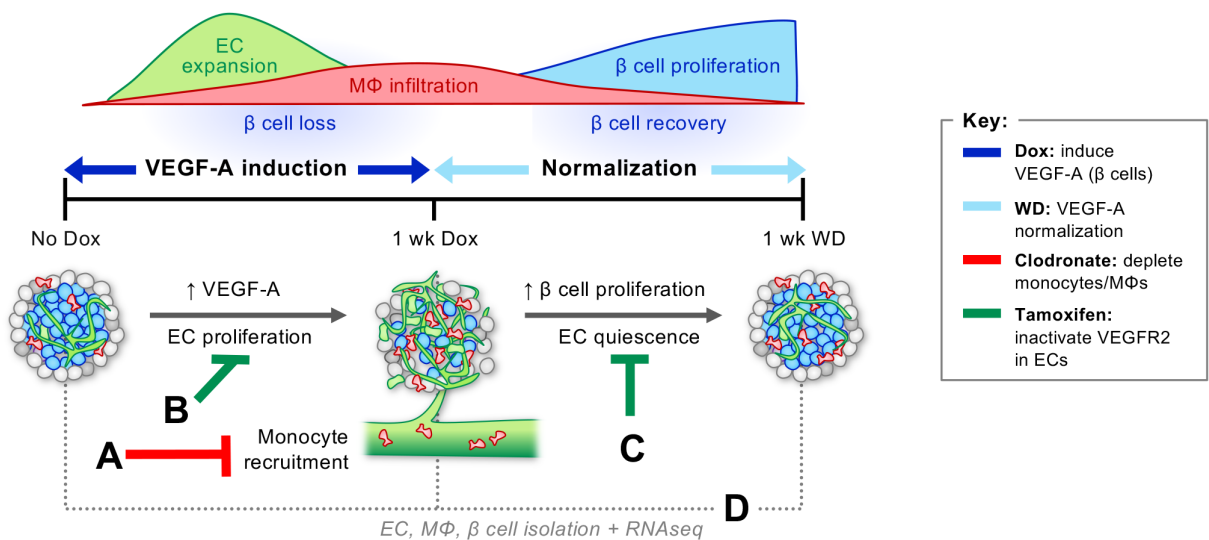

**Figure 1. The RIP-rtTA; Tet-O-VEGF-A ( $\beta$ VEGF-A) model of  $\beta$  cell regeneration permits specific modulation of the islet microenvironment.** Induction of VEGF-A overexpression in  $\beta$  cells with doxycycline (Dox) causes rapid endothelial cell (EC) expansion,  $\beta$  cell death, and recruitment of circulating monocytes increasing the number of intra-islet macrophages (MΦs). Once the Dox stimulus is removed, VEGF-A levels normalize and  $\beta$  cells undergo self-renewal<sup>1</sup>. **(A)** To establish the role of MΦs in  $\beta$  cell proliferation, monocytes and MΦs were depleted with clodronate liposomes. **(B)** To determine whether proliferative intra-islet ECs were required for  $\beta$  cell loss, MΦ recruitment, and MΦ phenotype activation, an additional genetic construct was introduced to knock down key signaling receptor VEGFR2 in ECs prior to VEGF-A induction. **(C)** To determine if VEGFR2 signaling in quiescent ECs contributes to  $\beta$  cell proliferation, VEGFR2 was inactivated in ECs during  $\beta$  cell recovery. **(D)** To identify cell-specific transcriptome changes during  $\beta$  cell loss and recovery, populations of ECs, MΦs, and  $\beta$  cells were isolated prior to and during VEGF-A induction, and after VEGF normalization. For additional details, including mouse models utilized, see **Figure S1**.

## RESULTS

71 We previously developed the  $\beta$ VEGF-A model, which allows for Dox-induced,  $\beta$  cell-specific  
 72 overexpression of VEGF-A causing rapid intra-islet EC expansion, widespread  $\beta$  cell loss, and  
 73 MΦ recruitment to islets from a pool of circulating monocytes<sup>1</sup>. When Dox is removed and

74 VEGF-A levels normalize, ECs return to baseline levels, but MΦs persist in the islet  
75 microenvironment, and β cells undergo a transient but robust proliferation that leads to β cell  
76 mass restoration (**Figure 1**).

### 77 ***Chemical depletion of macrophages in βVEGF-A islets inhibits β cell proliferation***

78 To dissect pathways and signaling molecules in the islet microenvironment required for β cell  
79 recovery, we first employed clodronate-mediated MΦ depletion which impacts both infiltrating  
80 and islet resident MΦs. Clodronate is an ATP/ADP translocase inhibitor, and when packaged  
81 into liposomes it is selectively taken up by MΦs due to their phagocytic properties and causes  
82 apoptosis. We treated βVEGF-A mice with either control or clodronate liposomes starting one  
83 day before VEGF-A induction and continuing for one week after VEGF-A normalization (**Figure**  
84 **2A**). Compared to control, clodronate treatment reduced circulating CD11b<sup>+</sup> Ly6G<sup>-</sup> monocytes  
85 by 50% within 24 hours (**Figure 2B**, *No Dox*, and **Figure S2**) and reduced the MΦ population in  
86 islets by 94% one week after VEGF-A induction (**Figure 2C** and **2D**, *1wk Dox*). MΦ depletion  
87 was maintained during VEGF-A normalization, with 86% fewer MΦ in islets from clodronate-  
88 treated βVEGF-A mice one week after Dox withdrawal (**Figure 2C** and **2D**, *1wk WD*). VEGF-A  
89 induction in clodronate-treated mice led to increased EC area (**Figures 2C** and **2E**) and β cell  
90 loss (**Figures 2B** and **2F**) comparable to βVEGF-A mice treated with control liposomes, thus  
91 demonstrating that clodronate treatment and MΦ depletion did not influence intra-islet EC  
92 expansion and hypervascularization-induced β cell loss. In contrast, MΦ depletion significantly  
93 impaired β cell proliferation during the recovery period (8.5 vs. 2.1%,  $p < 0.001$ ; **Figure 2G**) and  
94 resulted in reduced β cell area compared to controls after 6 weeks of VEGF-A normalization  
95 (**Figure 2F**), demonstrating that MΦs are required for the regenerative response in βVEGF-A  
96 islets. Interestingly, β cell area is slightly but significantly increased one week after Dox  
97 withdrawal (**Figure 2F**, *1wk WD*) in clodronate-treated βVEGF-A mice before ultimately the  
98 impaired β proliferation leads to reduced β cell area 6 weeks after VEGF-A normalization. This  
99 finding suggests that MΦs play an important role in islet remodeling and composition in βVEGF-  
100 A mice separate from their effect on β cell proliferation, most likely through their function as  
101 phagocytes.

### 102 ***Proliferative ECs are required for MΦ polarization and maximal MΦ recruitment***

103 To investigate the contribution of ECs to β cell loss and recovery in the βVEGF-A model, we first  
104 created a mouse line in which VEGFR2, which is enriched in ECs of islet capillaries and the  
105 main transducer of VEGF-A signal in islets, is inactivated by tamoxifen (Tm)-inducible Cre-  
106 mediated excision in ECs. We initially tested the EC-SCL-CreER<sup>T</sup> transgene<sup>24</sup>, which contains a

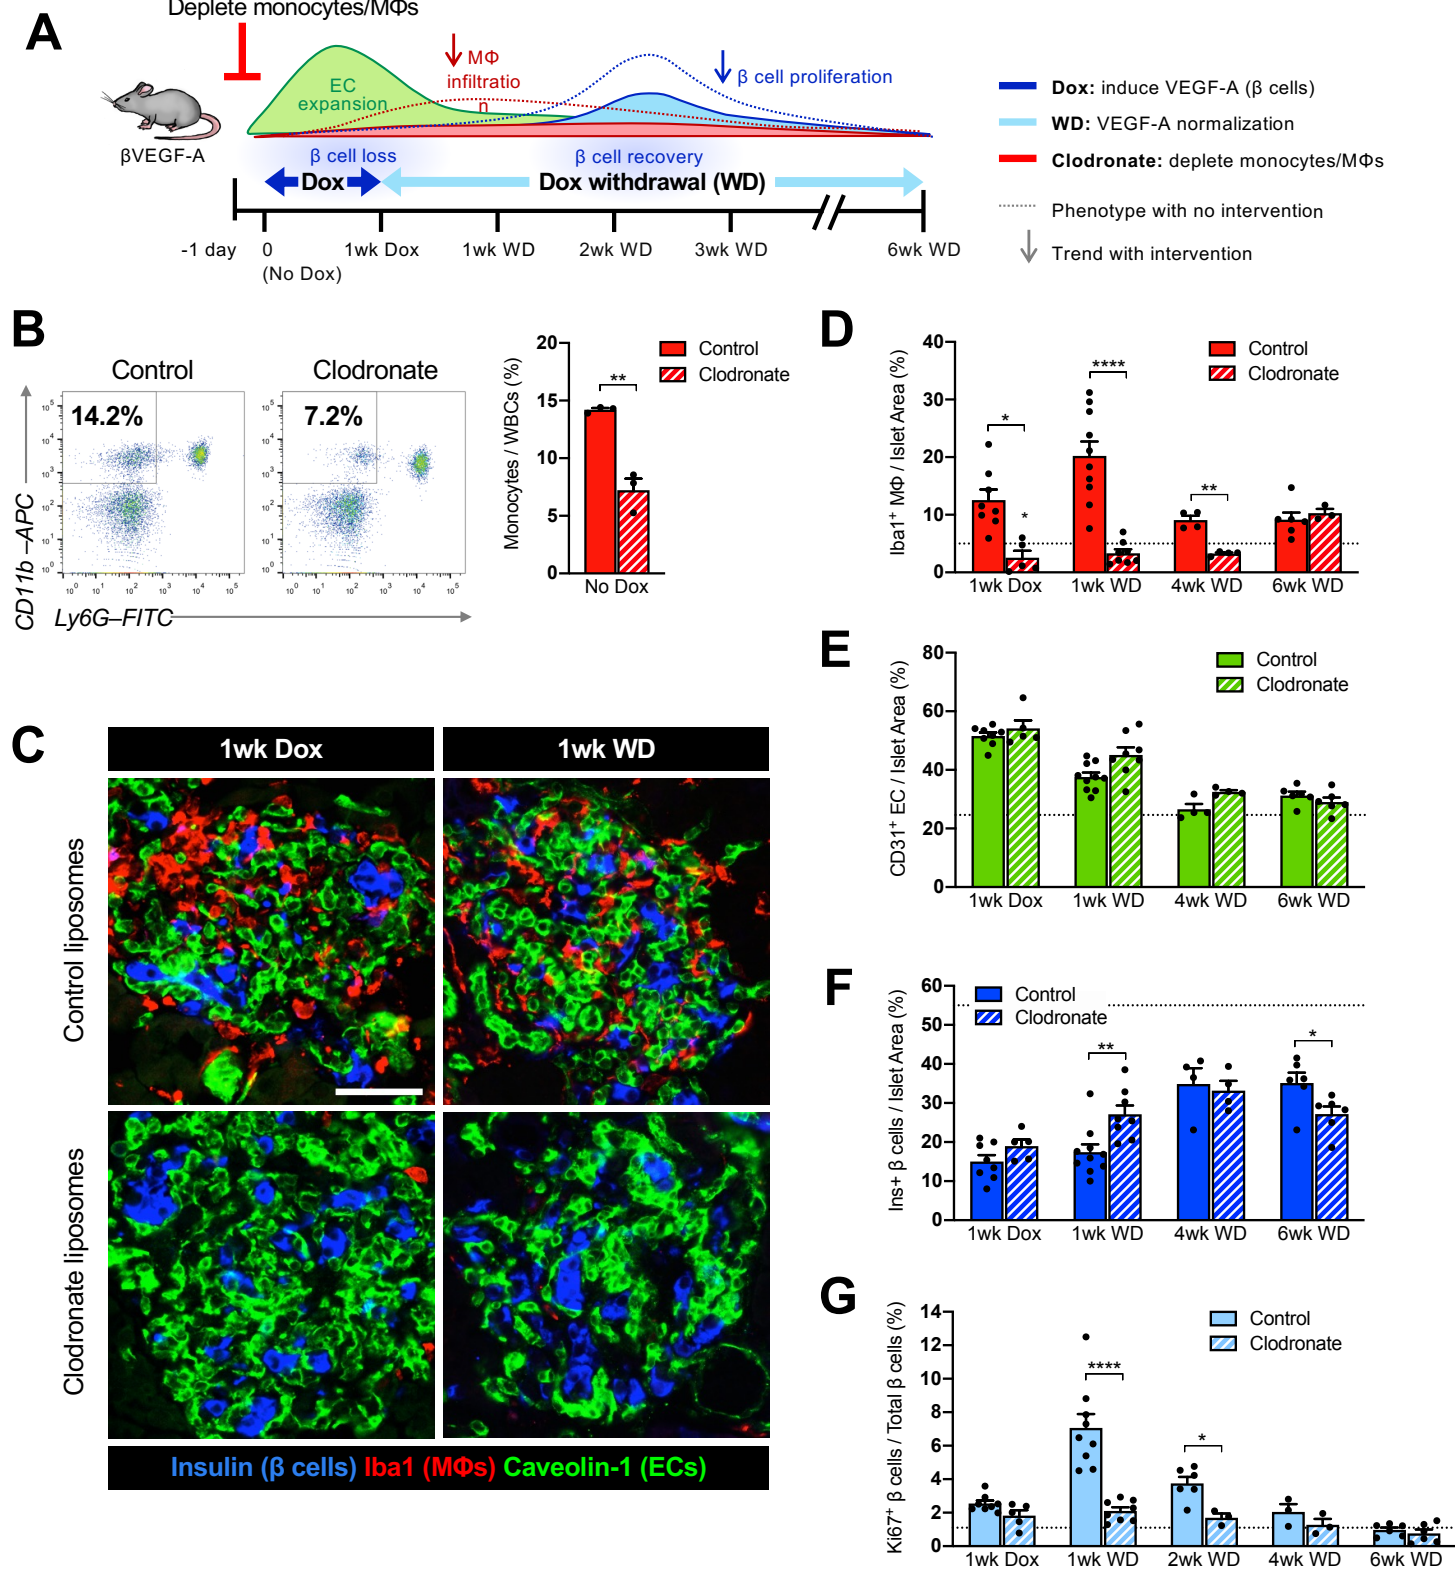

**Figure 2. Macrophages are required for  $\beta$  cell proliferation in**

**$\beta$ VEGF-A mice.** (A) To deplete macrophages (M $\Phi$ s) during VEGF-A induction and normalization,  $\beta$ VEGF-A mice were treated with clodronate or control liposomes (150-200  $\mu$ l i.v.) every other day, beginning one day before Dox treatment and continuing 1 week after Dox withdrawal (1wk WD). (B) Representative flow cytometry plots showing circulating monocytes (CD11b<sup>+</sup> Ly6G<sup>-</sup>) of control and clodronate-treated  $\beta$ VEGF-A mice 24 hours after single injection (No Dox). Approximately 10,000 white blood cells (WBCs) were analyzed (monocyte fraction reported as mean $\pm$ SEM) per each animal. (C) Islet architecture displayed by labeling for  $\beta$  cells (Insulin; blue), endothelial cells (Caveolin-1; green), and M $\Phi$ s (Iba1; red) during VEGF-A induction (1wk Dox) and normalization (1wk WD). Scale bar, 50  $\mu$ m. (D) Quantification (mean $\pm$ SEM) of islet M $\Phi$  area by immunohistochemistry ( $5.1 \pm 0.7 \times 10^5 \mu\text{m}^2$  total islet area analyzed per animal). (E-F) Quantification (mean $\pm$ SEM) of endothelial cell (EC) area (E) and  $\beta$  cell area (F) in  $\beta$ VEGF-A mice treated with control or clodronate liposomes during VEGF-A induction and normalization. (G) Rate of  $\beta$  cell proliferation (mean $\pm$ SEM; 1,138 $\pm$ 87  $\beta$  cells counted per animal) during VEGF-A normalization (1wk WD and 2wk WD) in control  $\beta$ VEGF-A mice was significantly reduced in clodronate-treated mice. In panels (B-G) each closed circle represents one animal; asterisks indicate unpaired two-tailed t-tests of control vs. clodronate groups; \*, p<0.05; \*\*, p<0.01; \*\*\*\*, p<0.0001. Dashed lines in D-G depict average values in  $\beta$ VEGF-A mice at baseline (No Dox).

107 5' endothelial enhancer for the stem cell leukemia (SCL) transcription factor, and although Cre  
108 activity was confirmed in islet ECs using the *Gt(ROSA)26Sor<sup>tm1Sor</sup>* reporter strain<sup>25</sup>, VEGFR2  
109 expression was unchanged in EC-SCL-CreER<sup>T</sup>; VEGFR2<sup>fl/fl</sup> mice (data not shown). Fortunately,  
110 were able to obtain the Cad5-CreER<sup>T2</sup> line<sup>26</sup> and achieved efficient EC-specific VEGFR2  
111 knockdown in Cad5-CreER<sup>T2</sup>; VEGFR2<sup>fl/fl</sup> (VEGFR2<sup>ΔEC</sup>) mice. Pancreata harvested after 3  
112 doses of Tm were evaluated to confirm VEGFR2 ablation (**Figures S3A** and **S3B**) without  
113 significant changes in islet capillary density or size (**Figures S3C** and **S3D**) or basal β cell  
114 proliferation (**Figure S3E**), indicating that acute loss of VEGFR2 signaling in ECs is not  
115 detrimental to adult islet vascular homeostasis or β cell proliferation. A similar observation was  
116 made previously when VEGF-A was acutely inactivated in adult β cells<sup>18</sup>. Next, we crossed  
117 VEGFR2<sup>ΔEC</sup> mice with the existing βVEGF-A line to effectively perturb VEGF-A–VEGFR2  
118 signaling in ECs at various time points during β cell loss and recovery. To control for any  
119 possible effects of Tm administration on compensatory β cell proliferation<sup>27</sup>, we treated all mice  
120 with Tm and designated Cre-negative (βVEGF-A; VEGFR2<sup>fl/fl</sup>) mice as controls to represent  
121 intact VEGFR2 signaling by ECs.

122 To determine the effect of proliferative ECs on MΦ recruitment and polarization, Tm was  
123 administered to knock down VEGFR2 (R2) in ECs prior to VEGF-A induction in β cells (**Figures**  
124 **4A** and **S4A**). VEGF-A was induced in both control βVEGF-A; R2<sup>fl/fl</sup> and βVEGF-A; R2<sup>ΔEC</sup>  
125 genotypes, with efficient knockdown of VEGFR2 in the latter (**Figure S4B**). As expected, VEGF-  
126 A induction caused a 7% EC expansion and associated 16% β cell loss per islet area in βVEGF-  
127 A; R2<sup>fl/fl</sup> controls, whereas EC and β cell area did not change in βVEGF-A; R2<sup>ΔEC</sup> mice (**Figures**  
128 **3B-D**). These results indicate that activation of VEGFR2 signaling in ECs by acute elevation of  
129 VEGF-A in the islet microenvironment is essential for islet hypervascularization and leads to β  
130 cell loss.

131 Inactivation of VEGFR2 signaling in ECs significantly reduced, but did not completely prevent  
132 MΦ recruitment to βVEGF-A; R2<sup>ΔEC</sup> islets compared to βVEGF-A; R2<sup>fl/fl</sup> controls (5.0 vs. 6.3%  
133 per total islet area, respectively; p<0.05) (**Figures 3E** and **3F**). This suggests that MΦ infiltration  
134 can occur in response to VEGF-A alone, which is consistent with the fact that VEGF-A can  
135 mediate monocyte recruitment through VEGFR1 activity<sup>28,29</sup>. Still, the proliferative EC  
136 environment (intact VEGF-A–VEGFR2 signaling and β cell loss) leads to maximal MΦ  
137 recruitment. Interestingly, a subset of infiltrating MΦs in control islets expressed the M2-like  
138 marker CD206 (Mrc1), which is normally made only by exocrine MΦs<sup>30,31</sup>, while infiltrating MΦs  
139 in βVEGF-A; R2<sup>ΔEC</sup> islets remained CD206<sup>-</sup> (**Figures 3E** and **3G**). This observation suggests

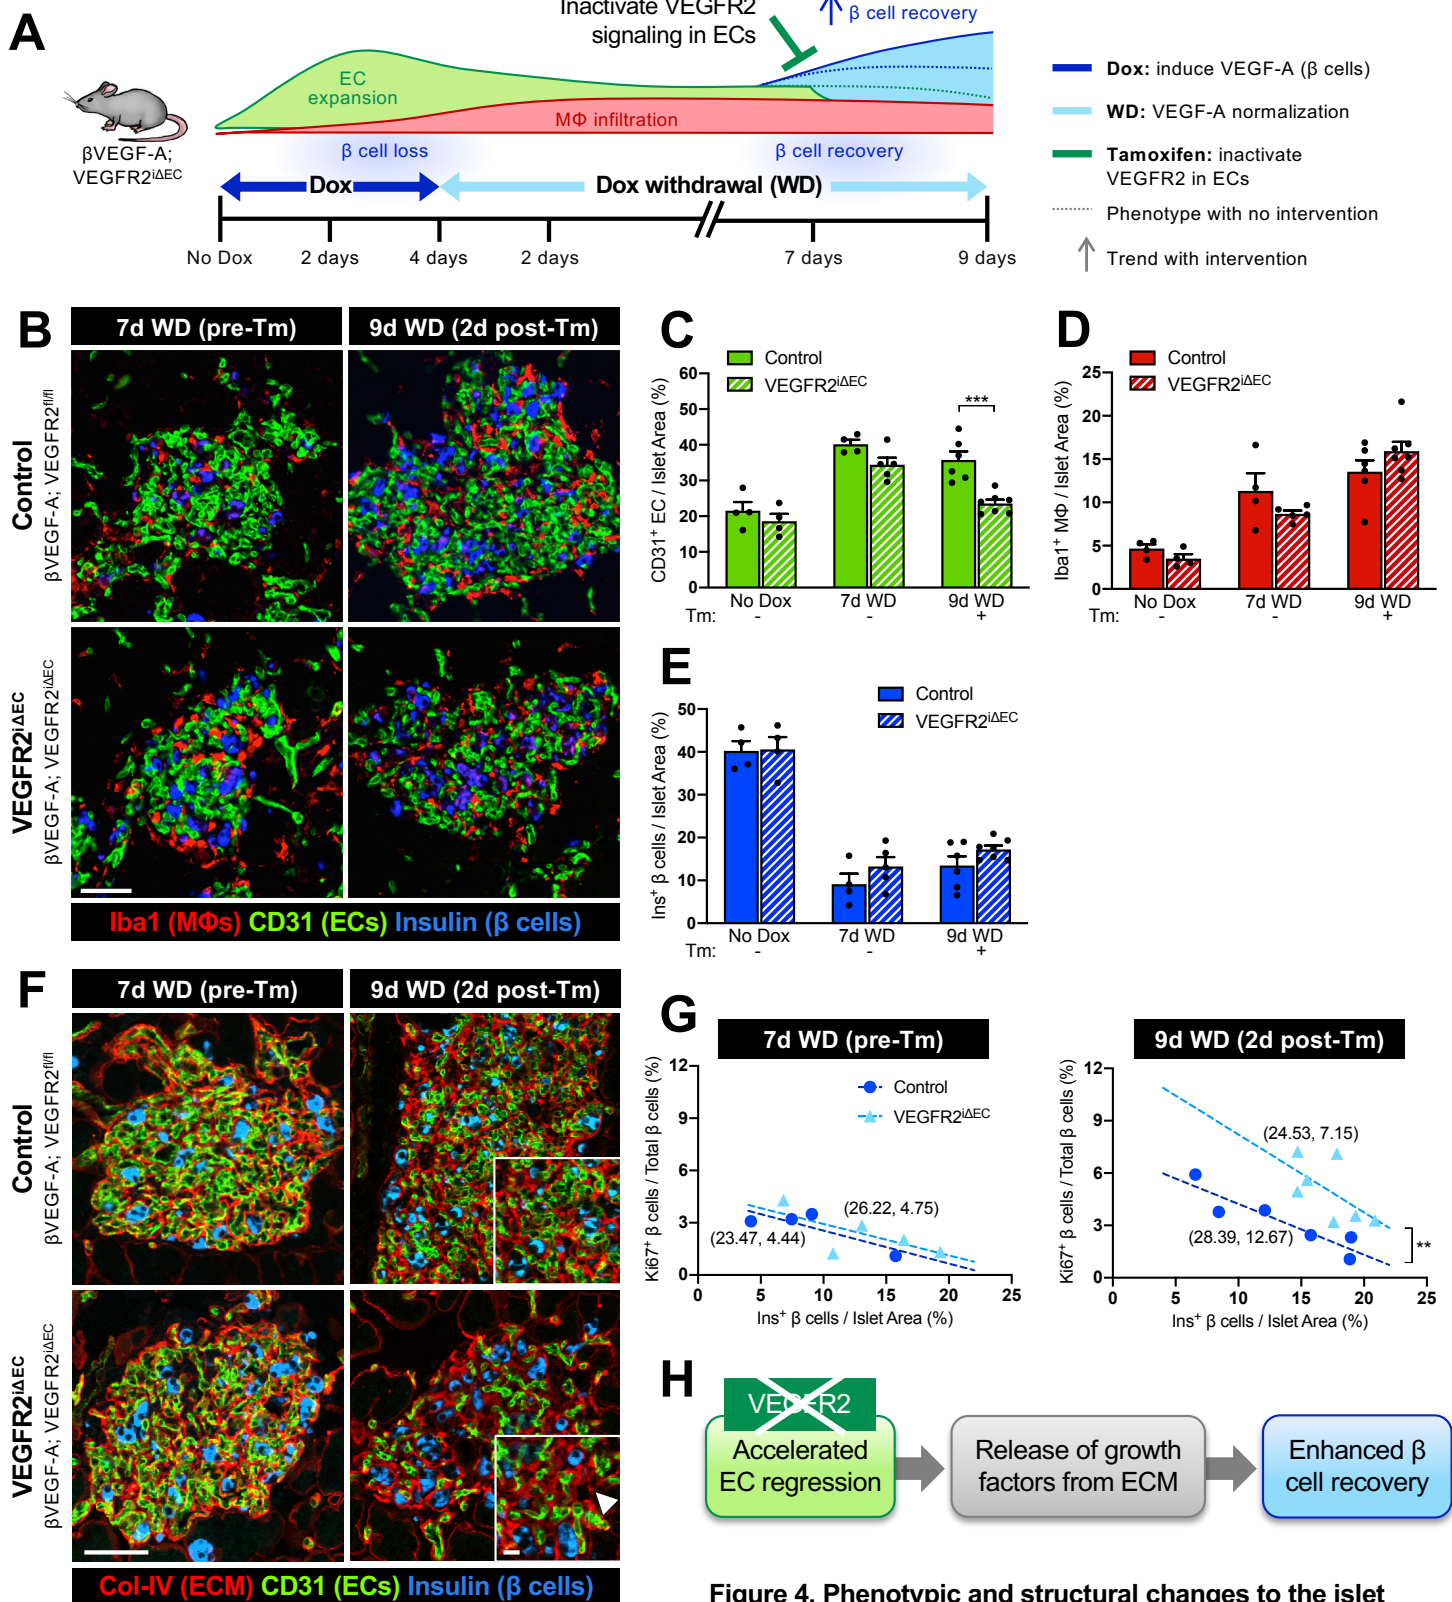

**Figure 4. Phenotypic and structural changes to the islet microenvironment in response to VEGFR2 inactivation in quiescent endothelial cells during  $\beta$  cell recovery.** (A) To inactivate VEGFR2 in endothelial cells (ECs) during  $\beta$  cell recovery, control ( $\beta$ VEGF-A; VEGFR2<sup>fl/fl</sup>) and VEGFR2 <sup>$\Delta$ EC</sup> ( $\beta$ VEGF-A; VEGFR2 <sup>$\Delta$ EC</sup>) mice received Tamoxifen (Tm; 4mg s.c.) after 7 days (d) of Dox withdrawal (WD). (B) Islet architecture visualized by labeling for macrophages (Iba1<sup>+</sup>) ECs (CD31<sup>+</sup>, green),  $\beta$  cells (Insulin<sup>+</sup>, blue) at 7d WD (pre-Tm) and 9d WD (2d post-Tm). Scale bar, 50  $\mu$ m. (C–E) Area quantification (mean $\pm$ SEM) of islet ECs (C), M $\Phi$ s (D), and  $\beta$  cells (E) by immunohistochemistry;  $14 \pm 1 \times 10^5 \mu\text{m}^2$  total islet area analyzed per animal. Each circle represents one animal; asterisks indicate results of unpaired two-tailed t-tests between genotypes; \*\*\*,  $p < 0.001$ . (F) Visualization of islet extracellular matrix by immunofluorescence (ECM; Col-IV<sup>+</sup>, red), ECs (CD31<sup>+</sup>, green),  $\beta$  cells (Insulin<sup>+</sup>, blue) at 7d WD (pre-Tm) and 9d WD (2d post-Tm). Scale bar, 50  $\mu$ m; inset, 10  $\mu$ m. Arrowhead in (F) points to ECM casts where ECs have regressed. (G)  $\beta$  proliferation rates (1,947 $\pm$ 145  $\beta$  cells per animal) plotted as a function of  $\beta$  cell loss (%  $\beta$  cells of total islet area) reveal a significant increase after VEGFR2 inactivation in quiescent ECs at 9d WD. Parentheses beside lines provide x- and y-intercepts derived from linear regression. At 9d WD, intercepts are significantly different; \*\*,  $p < 0.01$ . (H) Schematic of proposed mechanism for increased  $\beta$  cell area observed in VEGFR2 <sup>$\Delta$ EC</sup> mice.



140 that VEGFR2 signaling in proliferative ECs and/or  $\beta$  cell loss promotes M $\Phi$  polarization to an  
141 M2-like phenotype.

142 ***VEGFR2 inactivation in quiescent ECs accelerates EC regression, enhancing  $\beta$  cell***  
143 ***recovery***

144 To investigate the role of VEGFR2 signaling in quiescent ECs during  $\beta$  cell recovery, VEGF-A-  
145 mediated EC proliferation and  $\beta$  cell loss was first induced with 3-day Dox treatment in  $\beta$ VEGF-  
146 A; R2<sup>iAEC</sup> mice and controls, followed by 7 days of Dox withdrawal to allow VEGF-A to normalize  
147 and ECs to return back to quiescence (**Figures 4A, S5A**). Islet phenotype and  $\beta$  cell  
148 proliferation was assessed after 7 days of VEGF-A normalization (7d WD) and subsequently 2  
149 days post-Tm treatment to inactivate VEGFR2 (9d WD). VEGF-A-induced EC expansion,  $\beta$  cell  
150 loss, and M $\Phi$  infiltration occurred in both genotypes, with no difference between the two groups  
151 at 7d WD prior to VEGFR2 inactivation (**Figures 4B-E**). As expected, VEGF-A expression  
152 continued to decline during Dox withdrawal and VEGFR2 was efficiently inactivated in  $\beta$ VEGF-  
153 A; R2<sup>iAEC</sup> mice within 48 hours of a single 4-mg Tm injection (**Figure S5B**). Surprisingly, unlike  
154 under normal homeostatic conditions (**Figure S3**), VEGFR2 inactivation in  $\beta$ VEGF-A; R2<sup>iAEC</sup>  
155 mice significantly accelerated islet EC regression compared to controls (**Figure 4D**) without  
156 changes in M $\Phi$  phenotype (**Figure S5C**) and number (**Figure 4C**), suggesting that neither M $\Phi$   
157 retention nor polarization at this stage of  $\beta$  cell recovery are dependent on VEGFR2 signaling in  
158 quiescent ECs.

159 Since VEGFR2 inactivation in quiescent ECs of  $\beta$ VEGF-A; R2<sup>iAEC</sup> mice leads to a relatively rapid  
160 EC decline after Tm treatment (9d WD), we next evaluated the islet vascular regression by  
161 visualization of collagen IV, a major component of the islet ECM<sup>32,33</sup> generated by intra-islet  
162 ECs. This study revealed that regressing islet capillaries leave behind vascular “casts” of ECM  
163 that are no longer associated with intact ECs (**Figure 4F, 9d WD**). Even more surprising was  
164 our finding that this accelerated decline in islet ECs enhances  $\beta$  cell proliferation at 9d WD  
165 (**Figure 4G**). We hypothesize that in contrast to  $\beta$  cell homeostasis, the regression of quiescent  
166 ECs during the  $\beta$  cell recovery phase stimulates release of growth factors from degraded ECM,  
167 thereby promoting  $\beta$  cell proliferation (**Figure 4H**).

168 ***Identifying interactions between  $\beta$  cells, ECs, and M $\Phi$ s in the  $\beta$ VEGF-A islet***  
169 ***microenvironment***

170 Our prior studies in the  $\beta$ VEGF-A model localized the stimulus for  $\beta$  cell proliferation to the islet  
171 microenvironment, ruling out any contribution from circulating factors that might reach the

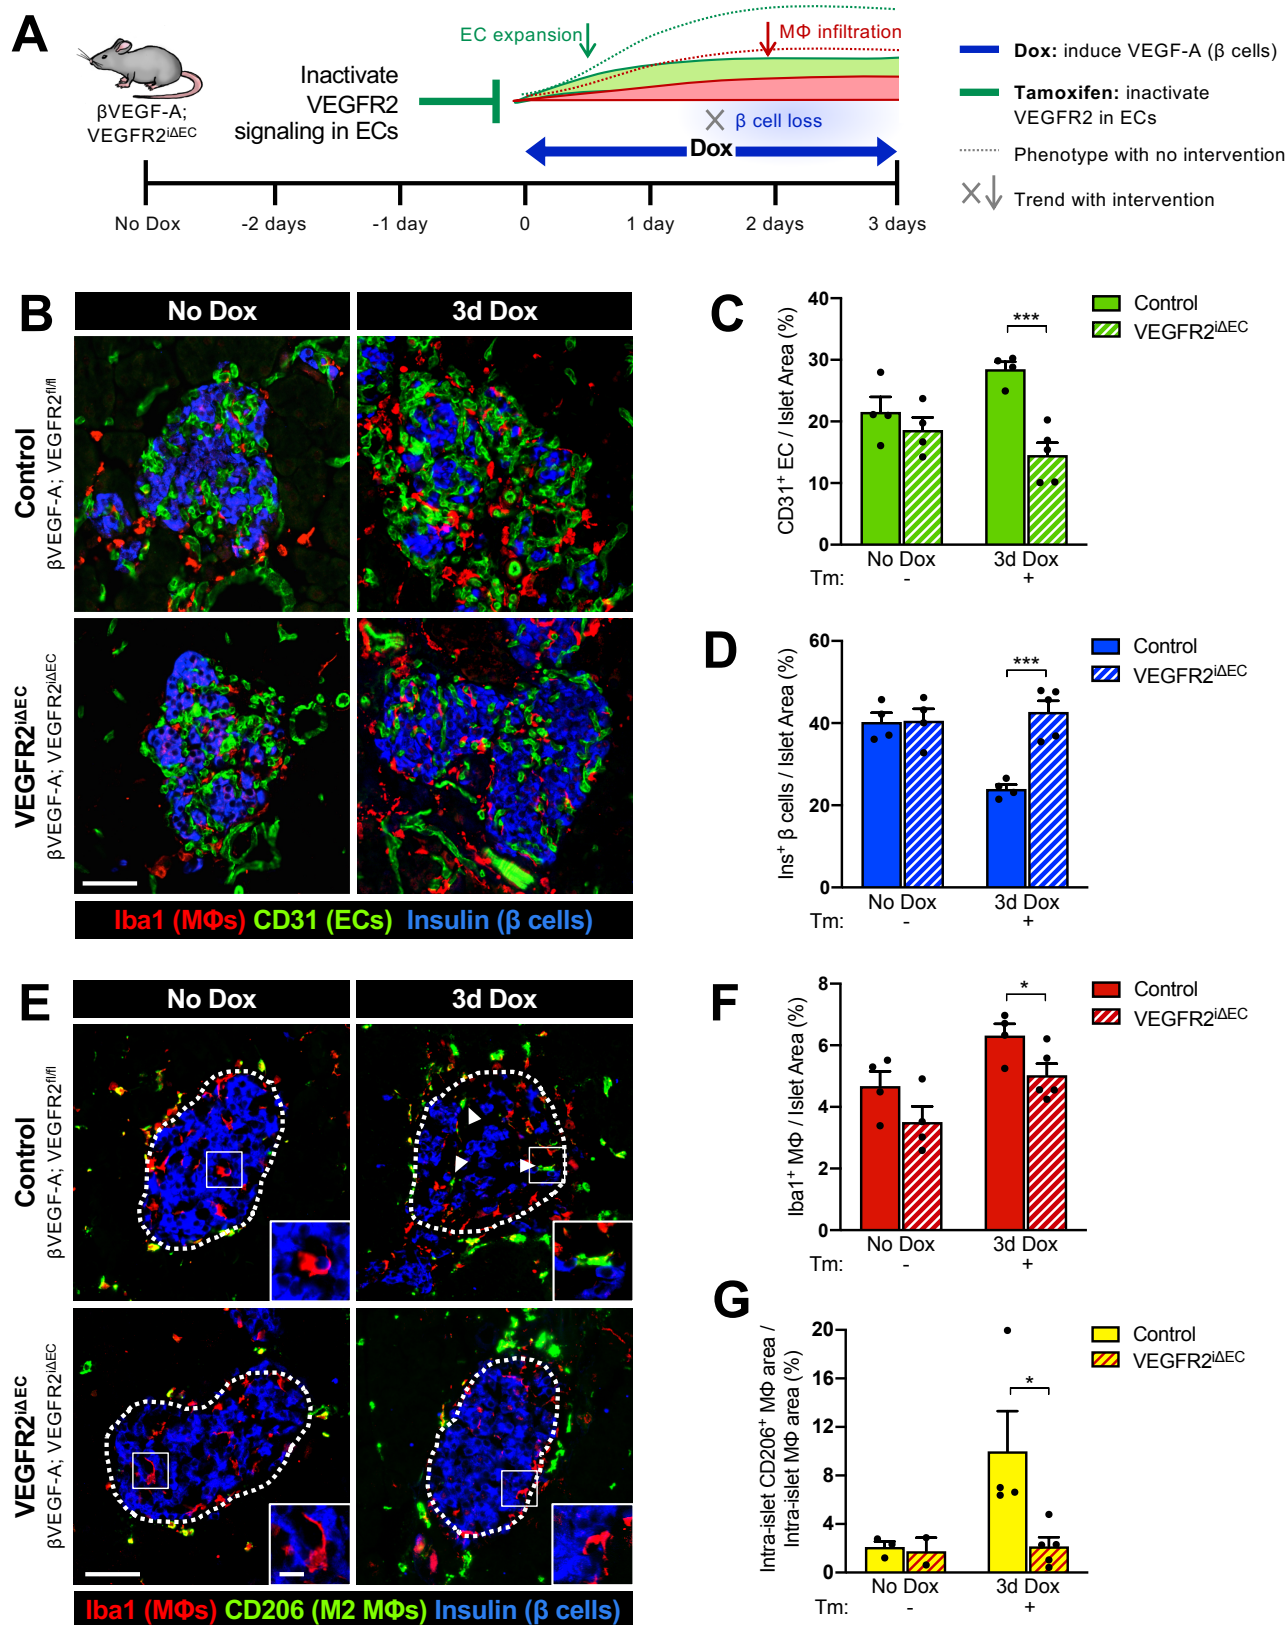

**Figure 3. Inactivation of VEGFR2 signaling in endothelial cells prevents  $\beta$  cell loss and M2-like macrophage polarization by acute elevation of VEGF-A in the islet microenvironment.** (A) To inactivate VEGFR2 in endothelial cells (ECs), control ( $\beta$ VEGF-A; VEGFR2<sup>fl/fl</sup>) and VEGFR2 $\Delta$ EAC ( $\beta$ VEGF-A; VEGFR2 $\Delta$ EAC) mice were treated with Tamoxifen (Tm; 4mg s.c.) prior to VEGF-A induction. (B) Islet architecture displayed by labeling for macrophages (Iba1<sup>+</sup>), ECs (CD31<sup>+</sup>), and  $\beta$  cells (Ins<sup>+</sup>) at baseline (No Dox) and after 3d Dox. (C–D) Quantification (mean $\pm$ SEM) of islet  $\beta$  cell and EC composition ( $10\pm 1 \times 10^5 \mu\text{m}^2$  total islet area analyzed per animal). (E) Some intra-islet macrophages (M $\Phi$ s) in control mice showed an “M2-like” phenotype (CD206<sup>+</sup>) after VEGF-A induction, indicated by arrowheads. Insets show representative intra-islet M $\Phi$ s in each group and time point. (F–G) Quantification (mean $\pm$ SEM) of M $\Phi$  infiltration and M2-like intra-islet M $\Phi$ s (percent CD206<sup>+</sup> Iba1<sup>+</sup> of Iba1<sup>+</sup>),  $3\pm 2 \times 10^5 \mu\text{m}^2$  total islet area analyzed per animal. Each closed circle in bar graphs represents one animal. Asterisks indicate unpaired two-tailed t-tests between genotypes; \*,  $p < 0.05$ ; \*\*\*,  $p < 0.001$ . Scale bars in (B) and (E), 50  $\mu\text{m}$ ; inset, 10  $\mu\text{m}$ .

172 pancreas<sup>1</sup>. With key roles established for both MΦs and ECs in this system, we next sought to  
173 identify potential mechanisms and signaling pathways coordinating cell-cell and cell-matrix  
174 interactions. To do this we isolated βVEGF-A islets at baseline (No Dox) and during the course  
175 of VEGF-A induction (1wk Dox) and normalization (1wk WD) and purified islet populations of β  
176 cells, ECs, and MΦs at each of these time points for transcriptome analysis (**Figures 5A, S6A**  
177 **and S6B**).

178 All of the nine sample types analyzed (3 cell types per each of 3 time points) demonstrate  
179 distinct transcriptional profiles, reflecting a high degree of uniqueness among three cell types  
180 and significant temporal changes in gene expression within each cell type (**Figures S6C-E**). By  
181 hierarchical clustering, the highest correlations were observed within one cell type across  
182 different time points; for example, β cells at No Dox are more similar to β cells at 1wk Dox and  
183 1wk WD than they are to MΦs or ECs at any time point. Of the β cell samples, regenerative β  
184 cells (1wk WD) are more similar to stressed β cells (1wk Dox) than quiescent β cells (No Dox);  
185 in contrast, regenerative MΦs (1wk WD) are more similar to resident MΦs (No Dox) than to  
186 those recruited upon VEGF-A induction (1wk Dox), and quiescent ECs following VEGF-A  
187 normalization (1wk WD) are more similar to quiescent ECs at baseline (No Dox) than to  
188 proliferative ECs (1wk Dox) (**Figure S6D**).

189 With the induction of VEGF-A (1wk Dox), all cell populations increase expression of growth  
190 factors, matrix remodeling enzymes involved in tissue repair and matrix degradation (MMPs,  
191 ADAMs, ADAMTSs), as well as cell adhesion molecules involved in cell-matrix and cell-cell  
192 interactions (ICAM1, VCAM1, selectins), many of which remain elevated during β cell  
193 regeneration (1wk WD) (**Figure S7A**). Pathway analysis shows a high degree of cellular motility  
194 (**Figure S7B**), and extracellular organization and cell adhesion processes are significantly  
195 enriched in all cell types during β cell recovery (**Figure S8**).

196 Infiltrating MΦs show elevated expression of both pro-inflammatory and pro-regenerative  
197 markers during periods of initial monocyte recruitment (1wk Dox) and β cell regeneration (1wk  
198 WD). Pro-inflammatory genes like *Il12b* and *Il1a* are upregulated at 1wk Dox, while M2 markers  
199 such as *Ptgs1* and *Retnla* are upregulated and/or remained elevated at 1wk WD (**Figure S7A**).  
200 Upregulation of chemokines and cytokines by MΦs and corresponding increase in expression of  
201 receptors (e.g., *Cxcr4*, *Il12rb2*) by β cells suggests crosstalk between the two cell types and  
202 potential phenotypic effects on β cells in addition to MΦs. Similarly, increased growth factor  
203 expression in ECs and MΦs appears in concert with increased expression of growth factor  
204 receptors in β cells (**Figure S7A**).

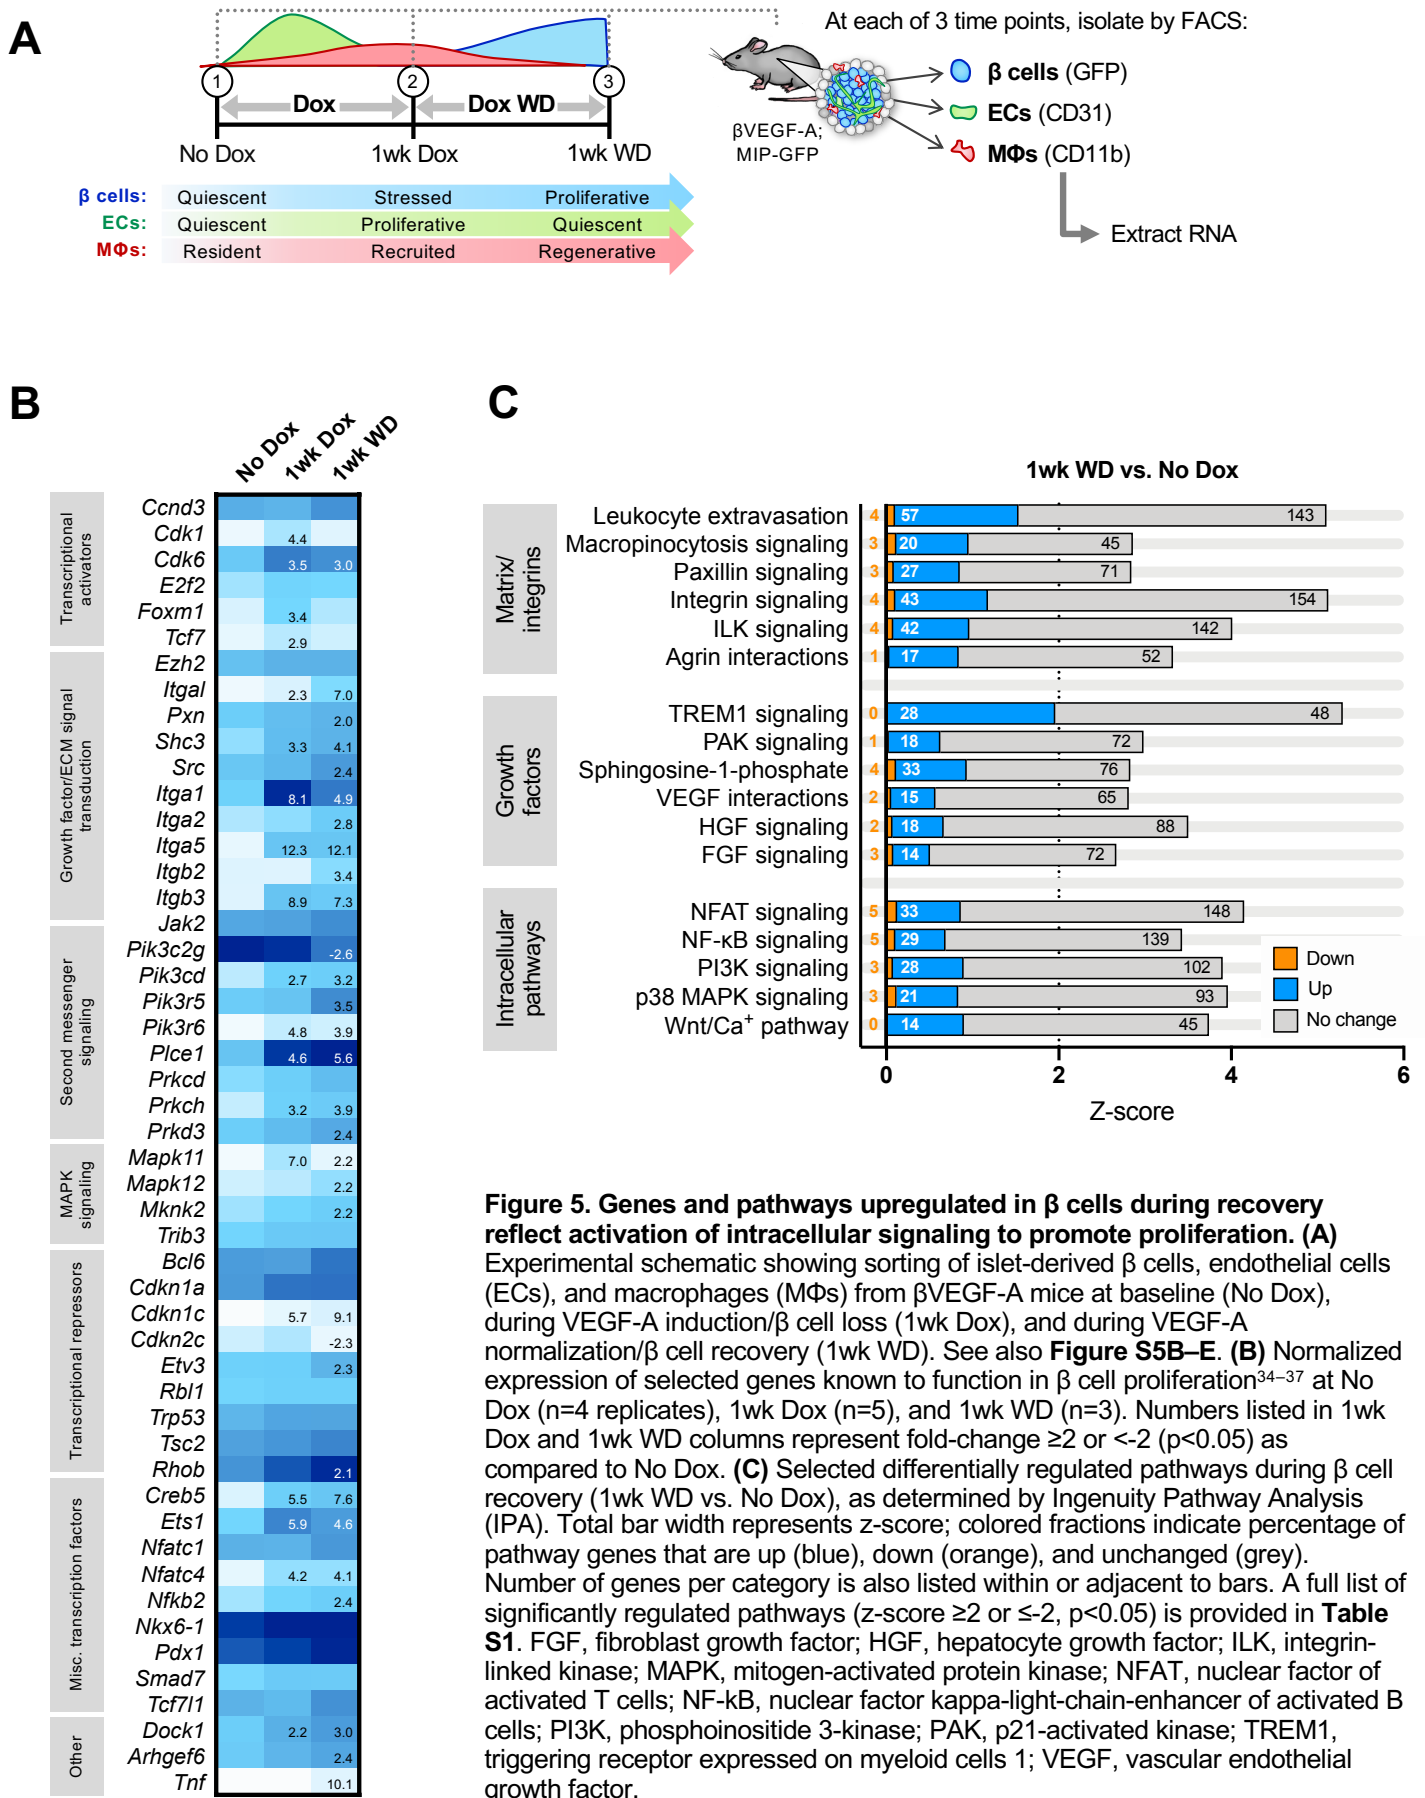

205 At the peak of regeneration (1wk WD),  $\beta$  cells highly express integrins and other molecules that  
 206 sense and respond to changes in the extracellular milieu (**Figure 5B**). Activation of integrin-  
 207 mediated signaling and the integrin-linked kinase pathway were accompanied by increases in  
 208 PI3K/Akt and MAPK signaling genes (**Figures S8A and 5C**), many of which are known  
 209 modulators of  $\beta$  cell proliferation<sup>34–37</sup>. Transcriptional activators *Cdk6* and *Foxm1* are initially  
 210 upregulated more than 3-fold compared to baseline, followed by downregulation of suppressor  
 211 *Cdkn2c* (p18) specifically during  $\beta$  cell recovery, consistent with previous studies of both mouse  
 212 and human  $\beta$  cells<sup>38–40</sup>. *Creb5* and *Ets1* are notably increased as well. Collectively, these data  
 213 provide evidence for a model where  $\beta$  cell proliferation is largely driven through M $\Phi$ –EC– $\beta$  cell  
 214 paracrine signaling, ECM remodeling, and cell-matrix interactions (**Figure 6**).

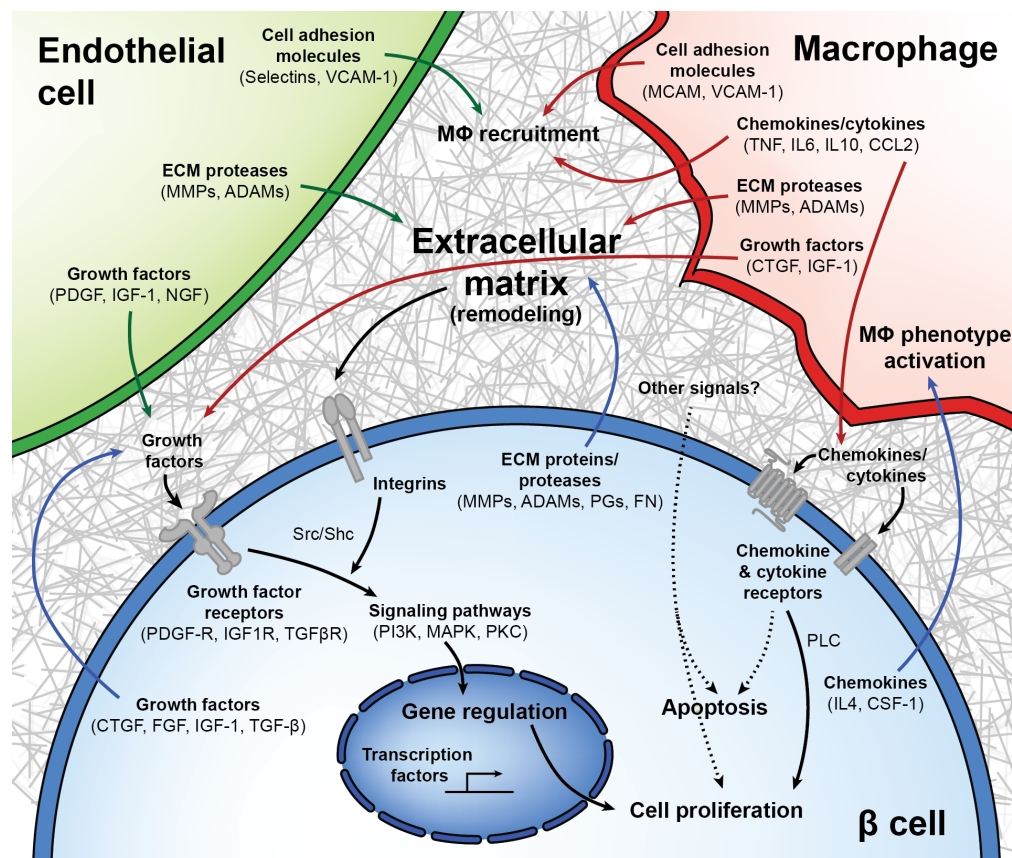

**Figure 6. Model of interactions between  $\beta$  cells, macrophages, endothelial cells, and the extracellular matrix in  $\beta$  cell regeneration.** Upon VEGF-A induction, intra-islet endothelial cells (ECs) proliferate while increasing expression of cell adhesion molecules and growth factors and altering their expression of integrins and extracellular matrix (ECM) remodeling enzymes. These adhesion molecules help recruit macrophages (M $\Phi$ s), which upon islet infiltration also upregulate expression of cell adhesion molecules and pro- and anti-inflammatory chemokines and cytokines, influencing further M $\Phi$  recruitment in addition to signaling through chemokine and cytokine receptors on  $\beta$  cells. Chemokine and cytokines become increasingly less inflammatory as VEGF-A normalizes, as M $\Phi$ s produce growth factors and matrix remodeling enzymes that may promote  $\beta$  cell proliferation. Upon VEGF-A induction,  $\beta$  cells exhibit enrichment for several integrin pathways and other proteins involved in ECM remodeling and cell-matrix interactions in addition to regulating expression of chemokines known to support a regenerative (M2 or alternative) M $\Phi$  phenotype. Growth factors from all cell types act on an increased number of growth factor receptors being expressed on  $\beta$  cells, activating downstream signals converging on the PI3K/Akt and MAPK pathways. Other signals from cells in the microenvironment, or from the rapidly remodeling ECM, may also play a role in  $\beta$  cell proliferation.

## DISCUSSION

215 Adult  $\beta$  cells have a very limited proliferative capacity and signals regulating this process are  
216 incompletely understood. The complexity of the islet microenvironment and difficulty modeling  
217 this complexity *in vitro* often constrains investigation of  $\beta$  cell proliferation to reductionist  
218 approaches, removing components of the *in vivo* environment known to contribute to the  
219 establishment and maintenance of  $\beta$  cell mass and thereby limiting the utility of these studies.  
220 Here we utilized the  $\beta$ VEGF-A mouse model<sup>1</sup> in which signals from the local islet  
221 microenvironment, including  $\beta$  cells, ECs, and M $\Phi$ s, promote proliferation of human as well as  
222 mouse  $\beta$  cells. To dissect how these microenvironmental components influence  $\beta$  cell loss and  
223 recovery within the context of this complex and dynamic *in vivo* model, we developed new  
224 experimental tools to intricately modulate EC and M $\Phi$  populations and their signaling within the  
225 islet. These tools, coupled with transcriptional analysis of temporal changes in gene expression  
226 patterns of  $\beta$  cells, ECs, and M $\Phi$ s, allowed us to gain important insight into the cell-cell and  
227 ECM-mediated signaling in this model, which work in concert to promote  $\beta$  cell proliferation  
228 (**Figure 6**).

### 229 **Role of macrophages**

230 Our transcriptome analysis suggested that M $\Phi$  recruitment to islets is facilitated not only by  
231 VEGF-A signaling but also by increased expression of cell adhesion molecules on both M $\Phi$ s  
232 and ECs, as well as increased production of chemokines and cytokines from M $\Phi$ s already in the  
233 islet microenvironment<sup>41</sup>. By specifically depleting M $\Phi$ s in  $\beta$ VEGF-A mice using clodronate  
234 liposomes, we demonstrated that M $\Phi$ s are required for  $\beta$  cell regeneration in the islet  
235 microenvironment. These recruited M $\Phi$ s have a unique hybrid phenotype: they express markers  
236 of both classical pro-inflammatory (M1) activation as well as alternative (M2) activation  
237 promoting tissue repair and regeneration. Though M $\Phi$ -derived cytokines and chemokines can  
238 exacerbate  $\beta$  cell stress<sup>42,43</sup>, the comparable  $\beta$  cell loss in M $\Phi$ -depleted and control islets  
239 suggests that M $\Phi$ s do not promote  $\beta$  cell apoptosis in this model. Instead, M $\Phi$ s downregulate  
240 key pro-inflammatory cytokines (*e.g.*, *Tnf*, *Il6*) at 1wk WD, concomitant with  $\beta$  cell proliferation.  
241 Their phenotypic profile at this stage is most reminiscent of phenotyping subtypes “M2a” (high  
242 expression of scavenger and phagocytic receptors like *Retnlb*/*Fizz2*, *Ym1*, and *Mrc1*; secretion  
243 of profibrotic and trophic factors like fibronectin, IGF, and TGF $\beta$ ) and “M2c” (associated with  
244 removal of apoptotic cells)<sup>44–46</sup>. This phagocytic phenotype is consistent with our finding that  
245 M $\Phi$ s at this time point (1wk WD) likely have an effect on islet remodeling and composition

246 separate from their effect on  $\beta$  cell proliferation. Together, these data suggest a phenotypic shift  
247 in M $\Phi$ s that facilitates  $\beta$  cell recovery and return to homeostasis in the islet, in line with an  
248 increasing number of studies observing tissue-restorative effects of M $\Phi$ s triggered in various  $\beta$   
249 cell injury models<sup>11,12,47</sup>. Further studies will be necessary to clarify the specific signals that  
250 regulate the phenotypic shift and define the cues that govern their withdrawal.

### 251 **Role of endothelial cells**

252 Regulated EC-derived signals are necessary for pancreatic and islet development<sup>17,48–50</sup>,  
253 optimal adult  $\beta$  cell function<sup>18</sup>, and islet revascularization after transplantation<sup>51–54</sup>. In addition,  
254 ECs and VEGFR2 signaling have been previously implicated in organ regeneration<sup>13,16</sup>. For  
255 example, during liver regeneration, sinusoidal ECs appear to have a biphasic effect in mediating  
256 hepatic reconstitution; proliferative angiogenesis of sinusoidal ECs inhibits hepatocyte self-  
257 renewal, whereas quiescent sinusoidal ECs stimulate hepatic regeneration<sup>13</sup>. To determine the  
258 role of proliferative and quiescent ECs in  $\beta$  cell loss and recovery, we generated a compound  
259  $\beta$ VEGF-A model with inducible VEGFR2 inactivation ( $\beta$ VEGF-A; VEGFR2<sup>i $\Delta$ EC</sup>) that allowed us to  
260 modulate VEGF-A–VEGFR2 signaling in ECs.

261 Our studies show that intact VEGFR2 signaling is required for the proliferative angiogenesis of  
262 islet endothelium, which ultimately results in  $\beta$  cell loss. Although transcriptome analysis did not  
263 reveal specific signals produced by proliferating ECs that would lead to  $\beta$  cell apoptosis during  
264 VEGF-A induction, there are significant changes in expression of matrix remodeling enzymes  
265 and cell adhesion molecules. Based on the importance of cell-matrix interactions in  $\beta$  cell  
266 survival *in vitro*<sup>20,55</sup>, we hypothesize that ECM changes associated with rapidly expanding  
267 endothelium likely contribute to  $\beta$  cell loss in the  $\beta$ VEGF-A system. In addition, we show that  
268 intact VEGFR2 signaling is necessary for accumulation of intra-islet M $\Phi$ s expressing CD206, a  
269 marker of an M2 phenotype. This observation is consistent with M $\Phi$  activation by EC-derived  
270 cues in the context of acute injury, a phenomenon that has been noted in numerous tissues<sup>56–58</sup>.  
271 Furthermore, a similar M2 phenotype (high IL-10, CD206) was shown to be required for  $\beta$  cell  
272 regeneration after DT-mediated ablation<sup>12</sup>, and elsewhere CD206 has been linked to increased  
273 expression of *Tgfb1* and *Egf*<sup>59</sup> and promotion of  $\beta$  cell proliferation via a Smad7-cyclin  
274 pathway<sup>11</sup>.

275 In contrast to lung and liver regeneration<sup>13,16</sup>, VEGFR2 inactivation in quiescent ECs (1wk WD)  
276 resulted in accelerated  $\beta$  cell recovery, which is associated with rapid islet capillary regression,  
277 leaving behind vascular “casts” of ECM components. We postulate that  $\beta$  cell proliferation is

278 promoted by release of growth factors from degraded ECM. Though ECs are no longer  
279 expanding at the 1wk WD time point, islets still contain quite extensive capillary networks that  
280 might be sustained by the residual extracellular VEGF-A we observed, as well as possibly other  
281 growth factors. Interestingly, VEGFR2 inactivation during  $\beta$  cell homeostasis does not impact  $\beta$   
282 cell proliferation and islet capillary morphology. It will be important to assess the role of  
283 quiescent ECs and VEGFR2 signaling in other  $\beta$  cell injury models in the future. In addition,  
284 these findings highlight that ECs have different roles in different tissues and during various  
285 physiologic and pathologic stressors.

### 286 **Role of extracellular matrix and integrated cellular interactions in $\beta$ cell proliferation**

287 By deconstructing the contributions of the cellular components of the islet microenvironment of  
288  $\beta$ VEGF-A mice, we were able to uncover a role for ECM remodeling and signaling in  $\beta$  cell  
289 proliferation. M $\Phi$ s, ECs, and  $\beta$  cells all show transcriptional regulation of integrin receptors and  
290 ECM remodeling enzymes, some of which have been shown previously to affect  $\beta$  cell  
291 proliferation<sup>22,60–62</sup>. In addition to shaping cell-matrix signaling, ECM reorganization can also  
292 lead to the release and/or activation of matrix-sequestered growth factors<sup>63–66</sup>. This is  
293 particularly relevant given the temporal increase of growth factor receptor expression in  $\beta$  cells  
294 during VEGF-A induction and normalization, suggesting heightened  $\beta$  cell responsiveness to  
295 signals from the rapidly remodeling ECM as VEGF-A normalizes. Together, these data provide  
296 evidence that ECM-bound growth factors released during EC regression promote  $\beta$  cell  
297 proliferation.

298 Remodeling of extracellular milieu can also influence M $\Phi$  phenotype<sup>67,68</sup>, though more work is  
299 required to define specific signaling pathways that regulate this process in the pancreas.  
300 However, our transcriptome data provides evidence that both M $\Phi$ s and ECs are quite attuned to  
301 their rapidly changing environment, with integrins and cell adhesion molecules being some of  
302 the most dynamically regulated genes in both cell types. Changes in these molecules are likely  
303 regulating M $\Phi$  recruitment and/or polarization<sup>69–72</sup>, which may explain the phenotypic shift that  
304 happens between M $\Phi$  recruitment (occurring rapidly in response to VEGF-A) and the  
305 appearance of  $\beta$  cell proliferation (during VEGF-A normalization).

306 It is also possible that  $\beta$  cells undergo intrinsic changes heightening their sensitivity to  
307 extracellular signals, supported by the observation that ECs and M $\Phi$ s increase expression of  
308 several growth factors known to promote  $\beta$  cell proliferation (IGF-1, PDGF, and CTGF)<sup>37,73–75</sup>  
309 while  $\beta$  cells simultaneously upregulate expression of corresponding receptors (*Igf1r*, *Pdgfr*).



310 Signaling cascades activated by integrins and growth factors exhibit extensive downstream  
311 crosstalk and protein activity that makes it difficult to determine pathway activation status based  
312 solely on gene expression. Nonetheless, we did observe transcriptional changes to components  
313 of the PI3K/Akt, PLC, and MAPK pathways, as well as upregulation of transcription factors  
314 regulated by the MAPK pathway<sup>34–37</sup> suggesting that the cell-cell and cell-ECM interactions may  
315 converge on the activation of these pathways leading to  $\beta$  cell proliferation. We therefore  
316 propose a model in which coordination of growth factors – whose bioavailability is likely  
317 modulated by ECs and M $\Phi$ s – together with increased integrin signaling promotes activation of  
318 pro-proliferative pathways in surviving  $\beta$  cells during VEGF-A normalization to ultimately restore  
319  $\beta$  cell mass (**Figure 6**).

320 Recognizing the key role of cellular and extracellular components of the islet microenvironment  
321 on  $\beta$  cell development, function, and homeostasis is critical to further our understanding of  
322 signals regulating adult  $\beta$  cell proliferation. Islet microenvironmental signaling in the  $\beta$ VEGF-A  
323 system promotes human  $\beta$  cell proliferation<sup>1</sup>, which prompted us to develop new strategies to  
324 disentangle the roles of various microenvironmental components in this regenerative process.  
325 However, moving forward it will be important to further explore the mechanisms and  
326 combination of specific cytokines, growth factors, and other microenvironmental signals that  
327 activate and regulate relevant mitogenic signaling pathways in human  $\beta$  cells. Overall, these  
328 studies highlight the importance of developing innovative approaches to examine  $\beta$  cells *in vivo*  
329 in order to more completely understand the complex microenvironmental factors regulating  $\beta$   
330 cell function and regeneration.

## METHODS

### 331 **Mouse Models**

332 All animal studies were approved by the Institutional Animal Care and Use Committee at  
333 Vanderbilt University Medical Center, and animals were kept in facilities monitored by the  
334 Vanderbilt University Division of Animal Care on a 12 hour light/12 hour dark schedule with  
335 unrestricted access to standard chow and water. Mouse models and abbreviations used to  
336 describe them are summarized in **Table S2**.

337 **RIP-rtTA; TetO-VEGF ( $\beta$ VEGF-A) mice.** The original bitransgenic mice with doxycycline (Dox)-  
338 inducible  $\beta$ -cell-specific overexpression of human VEGF-A<sub>165</sub> (abbreviated  $\beta$ VEGF-A) were  
339 generated by crossing RIP-rtTA male mice and TetO-VEGF female mice, both on a C57BL/6  
340 background<sup>76–80</sup>. These mice were generously provided by Dr. Shimon Efrat of Tel Aviv  
341 University and Dr. Peter Campochiaro of Johns Hopkins University, respectively. In this  $\beta$ VEGF-  
342 A model the rat *Ins2* promoter drives expression of the tetracycline-responsive rtTA  
343 transactivator specifically in pancreatic  $\beta$  cells. Upon exposure to Dox, the rtTA transactivator  
344 binds the tetracycline operator (*TetO*), driving expression of human VEGF-A<sub>165</sub> in  $\beta$ -cells. Details  
345 of Dox preparation and administration are included below.

346 **Cd5-CreER; VEGFR2<sup>fl/fl</sup> (VEGFR2<sup>iAEC</sup>) mice.** Mice with Tamoxifen (Tm)-inducible EC-specific  
347 knockout of VEGFR2 (abbreviated VEGFR2<sup>iAEC</sup>) were generated by crossing Cd5-CreER male  
348 mice and VEGFR2<sup>fl/fl</sup> female mice (see **Table S3**, crosses A1-A2). Heterozygous VEGFR2<sup>fl/wt</sup>  
349 mice on a C57BL/6 background were obtained from Jackson Laboratories (stock #018977) and  
350 bred to create a homozygous VEGFR2<sup>fl/fl</sup> line. Frozen sperm from the Cd5-CreER line<sup>26</sup> was  
351 generously provided by Dr. Yoshiaki Kubota of Keio University, and *in vitro* fertilization (IVF)  
352 was performed by the Vanderbilt Genome Editing Resource using female C57BL/6 mice  
353 (Jackson Laboratories, stock #000664). In the VEGFR2<sup>iAEC</sup> model *loxP* sites were inserted  
354 flanking VEGFR2 exon 3, and the *Cdh5* (*VE-cadherin*) promoter drives expression of Tm-  
355 inducible Cre recombinase in vascular ECs. Upon exposure to Tm, Cre recombinase  
356 translocates to the nucleus, excising VEGFR2 exon 3 through Cre-*loxP* recombination and  
357 subsequently preventing VEGFR2 expression in ECs. Details of Tm preparation and  
358 administration are described below.

359  **$\beta$ VEGF-A; VEGFR2<sup>iAEC</sup> mice.** To generate an inducible model of EC-specific knockdown of  
360 VEGFR2 in  $\beta$ VEGF-A mice, Cd5-CreER and VEGFR2<sup>fl/fl</sup> mice were crossed with RIP-rtTA and

361 TetO-VEGF transgenic mice as outlined in **Table S3**. The final cross produced both  $\beta$ VEGF-A;  
362 VEGFR2<sup>i $\Delta$ EC</sup> mice as well as Cre-negative sibling controls ( $\beta$ VEGF-A; VEGFR2<sup>fl/fl</sup>). Due to the  
363 inefficient induction of VEGF-A in female mice (the single copy of the *TetO* transgene is subject  
364 to X chromosome inactivation), only male mice were used for experiments.

365  ***$\beta$ VEGF-A; MIP-GFP mice.*** To enable fluorescence-activated cell sorting (FACS) of pancreatic  $\beta$   
366 cells from  $\beta$ VEGF-A mice, a transgene was separately introduced into the  $\beta$ VEGF-A mouse  
367 model by crossing MIP-GFP mice on a C57BL/6 background<sup>81</sup> (Jackson Laboratories, stock  
368 #006864) with RIP-rtTA and Tet-O-VEGF-A mice (abbreviated  $\beta$ VEGF-A; MIP-GFP). In these  
369 mice, the mouse *Ins1* promoter drives green fluorescent protein (GFP) expression in  $\beta$  cells.

370 ***DNA extraction and genotyping.*** Mouse models used in our breeding schemes were  
371 maintained by genotyping using the primers and PCR conditions listed in **Table S4**. DNA was  
372 extracted and PCR reactions were performed with tail snips from mice as described previously<sup>1</sup>.  
373 Thermal cycler conditions listed in **Table S4** were used to amplify DNA before resolving on  
374 agarose gels with 100 ng/ml ethidium bromide in 1X Tris/Borate/EDTA (TBE) buffer as  
375 indicated.

376 ***Compound preparation and administration.*** VEGF-A transgene expression was activated in  
377  $\beta$ VEGF-A mice by Dox administration (5 mg/ml) in light-protected drinking water containing 1%  
378 Splenda<sup>®</sup> for a period of 3-7 days. VEGFR2 knockdown was induced in VEGFR2<sup>i $\Delta$ EC</sup> mice by  
379 subcutaneous injection of 4 mg Tm (20 mg/ml; 200  $\mu$ l). Tm (20 mg/ml) was prepared fresh in  
380 filter-sterilized corn oil the day before each injection and allowed to dissolve overnight on a  
381 shaker at room temperature, protected from light. Vetbond tissue adhesive (3M) was used to  
382 seal injection sites to prevent oil leakage. Clodronate-mediated macrophage depletion in  
383  $\beta$ VEGF-A mice was accomplished by injecting 150-200  $\mu$ l clodronate liposomes (5 mg/ml;  
384 Clodrosome) retro-orbitally every other day for a 1-2 week period (4-8 total injections).  
385 Liposome injections began one day before Dox administration and continued for 1 week after in  
386 mice harvested at later time points. Control liposomes with the same lipid composition  
387 (Clodrosome) were administered to  $\beta$ VEGF-A mice using the same route, volume, and  
388 schedule. Mice receiving liposome injections were supplemented with Transgenic Dough Diet  
389 (21.2% protein, 12.4% fat, 46.5% carbohydrate; BioServ) throughout the course of the  
390 experiment.

391 **Glucose measurements.** Random (non-fasted) plasma glucose levels were measuring by  
392 obtaining whole blood from nicked tail veins using an Accu-chek glucose meter (Roche  
393 Diagnostics) calibrated according to the manufacturer's instructions.

#### 394 **Tissue Collection and Fixation**

395 Mouse pancreata were collected from anesthetized mice prior to cervical dislocation. Organs  
396 were washed in ice-cold 10 mM phosphate buffered saline (PBS), then fat and other excess  
397 tissue was removed before pancreata were weighed and processed. Fixation was performed in  
398 0.1 M PBS containing 4% paraformaldehyde (Electron Microscopy Sciences) for 2-3 hours on  
399 ice with mild agitation, then organs were washed in four changes of 0.1 M PBS over 2 hours  
400 and equilibrated in 30% sucrose/0.01 M PBS overnight. After blotting to remove excess  
401 sucrose, tissues were mounted in Tissue Tek cryomolds filled with Tissue-Plus Optimal Cutting  
402 Temperature (OCT) compound (VWR Scientific Products). Tissue molds were placed on dry ice  
403 until the OCT was set, then stored at -80°C. Tissues were sectioned from 5-10  $\mu$ m thick on a  
404 Leica CM1950 cryostat (Leica) and these cryosections were attached to Superfrost Plus Gold  
405 slides (ThermoFischer Scientific).

#### 406 **Immunohistochemistry, Imaging, and Analysis**

407 Immunohistochemical analysis was performed on serial 8-10  $\mu$ m pancreatic cryosections as  
408 described previously<sup>1,18</sup>. Briefly, tissue permeabilization was conducted using 0.2% Triton-X in  
409 10nM PBS and blocking using 5% normal donkey serum in 10mM. Primary and secondary  
410 antibody incubations (listed in **Table S5**) were performed in buffer with 0.1% Triton-X and 1%  
411 BSA and nuclei were counterstained with DAPI. Slides were mounted using SlowFade Gold  
412 antifade reagent (Invitrogen Molecular Probes) and sealed with fingernail polish prior to imaging.

413 Digital images were acquired with a Leica DMI6000B fluorescence microscope equipped with a  
414 Leica DFC360FX digital camera (Leica), a laser scanning confocal microscope (Zeiss LSM510  
415 META or LSM880, Carl Zeiss), and a ScanScope FL (Aperio). Image analysis was performed  
416 using MetaMorph 7.7 software (Molecular Devices), ImageScope software (Aperio), or HALO  
417 software (Indica Labs).

418 For analysis of islet composition, images of entire pancreatic sections were captured at 20x  
419 magnification using a ScanScope FL system. Islet area was annotated manually based on  
420 insulin staining, and HALO algorithms were used to calculate area of  $\beta$  cells (Insulin<sup>+</sup>), ECs

421 (CD31<sup>+</sup>), and MΦs (Iba1<sup>+</sup>). For β cell proliferation, cells were deemed positive for Ki67 only  
422 when at least 75% of the nucleus was surrounded by insulin<sup>+</sup> cytoplasm.

### 423 **Flow Cytometry and Cell Sorting**

424 Flow analysis and sorting was performed in collaboration with the Vanderbilt Flow Cytometry  
425 Core. Peripheral blood (50-100 μl) was collected from the retro-orbital sinus of βVEGF-A mice  
426 using heparinized capillary tubes 24 hours after beginning liposome injections to evaluate  
427 depletion of circulating monocytes. Blood was incubated for 3-5 minutes at 37°C with 1 ml  
428 warmed, filter-sterilized erythrocyte lysis buffer (8.26 g ammonium chloride, 1 g potassium  
429 bicarbonate, and 0.38 g EDTA in 1 L Milli-Q water). Cells were pelleted by centrifuging at 1800  
430 rpm for 2-3 minutes at 4°C and supernatant discarded. Incubation with erythrocyte lysis buffer  
431 was repeated, and then cells were washed with 1 ml FACS buffer (2 mM EDTA and 2% FBS in  
432 10 mM PBS) prior to antibody incubation. Blood from WT mice was collected for antibody  
433 compensation controls.

434 Isolated islets from βVEGF-A; MIP-GFP mice handpicked in Clonetics EGM MV Microvascular  
435 Endothelial Cell Growth Medium (Lonza) were washed 3 times with 2 mM EDTA in 10 mM PBS  
436 and then dispersed by incubating with Accutase (Innovative Cell Technologies) at 37°C for 10  
437 minutes with constant pipetting. Accutase was quenched with EGM MV media, and then islet  
438 cells were washed twice with the same media and counted using a hemocytometer prior to  
439 antibody incubation. Anti-rat Ig, κ CompBead Plus Compensation Particles (BD Biosciences)  
440 and EasyComp Fluorescent Particles, GFP (Spherotech) were used as single color  
441 compensation controls for islet cell sorts.

442 Peripheral blood and islet cells prepared as described above, and anti-rat Ig compensation  
443 particles were incubated for 15-20 minutes at 4°C with fluorophore-conjugated antibodies in  
444 FACS buffer followed by one wash with FACS buffer. All antibodies for flow cytometry and their  
445 working dilutions are listed in **Table S5**. Prior to analysis or sorting, either propidium iodide (0.05  
446 μg/100,000 cells; Invitrogen Molecular Probes) or DAPI (0.25 μg/1,000,000 cells; Invitrogen  
447 Molecular Probes) was added to samples for non-viable cell exclusion. Flow analysis was  
448 performed using an LSRFortessa cell analyzer (BD Biosciences) and a FACSAria III cell sorter  
449 (BD Biosciences) was used for FACS. Analysis of flow cytometry data was completed using  
450 FlowJo 7.6.5-10.2.1 (FlowJo LLC).

## 451 **RNA Isolation, Sequencing, and Analysis**

452 Sorted islet-derived cells (8,000-400,000/sample) were added to 200-400  $\mu$ l lysis/binding  
453 solution in the RNAqueous micro-scale phenol-free total RNA isolation kit (Ambion). Trace  
454 contaminating DNA was removed with TURBO DNA-free (Ambion). RNA quality control  
455 quantification was performed using a Qubit Fluorometer (Invitrogen, Carlsbad, CA) and an  
456 Agilent 2100 Bioanalyzer. All RNA samples had an RNA integrity number (RIN)  $\geq$ 5.0. RNA was  
457 amplified using the Ovation system (NuGen Technologies) according to standard protocol.  
458 Amplified cDNA was sheared to target 300bp fragment size and libraries were prepared using  
459 NEBNext DNA Library Prep (New England BioLabs). 50bp Paired End (PE) sequencing was  
460 performed on an Illumina HiSeq 2500 using traditional methods<sup>82,83</sup>. Raw reads were mapped to  
461 the reference mouse genome mm9 using TopHat v2.0<sup>84</sup> and aligned reads were then imported  
462 onto the Avadis NGS analysis platform (Strand Scientific). Transcript abundance was quantified  
463 using the TMM (Trimmed Mean of M-values) algorithm<sup>85,86</sup>. Samples were compared by  
464 principle component analysis (PCA) and hierarchal clustering analysis. A minimum expression  
465 cutoff (normalized expression  $\geq$ 20 at one or more time points) was applied before determining  
466 differential expression between samples, which was calculated on the basis of fold change  
467 (cutoff  $\geq$ 2 or  $\leq$ -2) with p-values estimated by z-score calculations (cutoff 0.05) as determined by  
468 the Benjamini Hochberg false discovery rate (FDR) method<sup>87</sup>. Differentially expressed genes  
469 were further analyzed through Ingenuity Pathway Analysis (IPA, Qiagen) and Gene Ontology  
470 (GO) analysis using DAVID<sup>88</sup>. RNA quality control, amplification, sequencing, and analysis were  
471 performed in collaboration with the Genomic Services Laboratory at HudsonAlpha Institute for  
472 Biotechnology.

## 473 **Statistical Analysis**

474 Prism software (GraphPad) was used to perform all statistical analyses for  
475 immunohistochemistry. In all experiments manipulating M $\Phi$ s and ECs, control and experimental  
476 groups were compared at each time point using an unpaired t test. For analysis of proliferative  
477 ECs, unpaired t tests were also used to compare baseline (No Dox) and VEGF-A induction (3d  
478 Dox) time points within each group. For analysis of quiescent ECs, a one-way analysis of  
479 variance (ANOVA) was used to analyze time points within each group, followed by Tukey's  
480 multiple comparison test to compare each time point with baseline (No Dox). Unless otherwise  
481 noted, data are expressed as mean + standard error of mean (SEM). Statistical analysis of  
482 RNA-sequencing data is described above (see RNA Isolation, Sequencing, and Analysis).

483 **AUTHOR CONTRIBUTIONS**

484 Conceptualization, D.C.S., K.I.A., M.B., and A.C.P.; Methodology, D.C.S., K.I.A., M.B., and  
485 A.C.P.; Investigation, D.C.S., K.I.A., T.M.R., A.H., Z.K., R.A., G.P., R.J., and M.B.; Formal  
486 Analysis, N.P.; Writing – Original Draft, D.C.S., M.B., and A.C.P.; Writing – Review & Editing, all  
487 authors; Funding Acquisition, A.C.P.; Supervision, A.C.P., M.B., and S.E.L.

488 **ACKNOWLEDGEMENTS**

489 We thank Drs. Y. Kubota, S. Efrat, P. Campochiaro, and M. Gannon for providing mice. We are  
490 grateful to Drs. A. Pozzi, A. Hatzopoulos, D. Jacobson, R. Stein, P. Kendall, J. Thomas, V.  
491 Babaev, P. Young, and Y. Dor for helpful discussions. This work was supported by grants from  
492 the Department of Veterans Affairs, the JDRF, the NIH (DK106755, DK89572, DK66636,  
493 DK69603, DK63439, DK62641, DK72473, DK94199, DK68764, DK97829, DK11232,  
494 DK117147, DK104211), and the Vanderbilt Diabetes Research and Training Center (DK20593).  
495 Islet isolation was performed in the Vanderbilt Islet Procurement and Analysis Core (DK20593).  
496 Image acquisition was performed in part through use of the Vanderbilt Cell Imaging Shared  
497 Resource (CA68485, DK20593, DK58404, DK59637, EY08126) and Vanderbilt Islet  
498 Procurement and Analysis Core (DK20593). Flow cytometry was performed in the Vanderbilt  
499 Flow Cytometry Shared Resource (P30 CA68485, DK058404). Cd5-CreER mouse line  
500 rederivation was performed by the Vanderbilt Genome Editing Resource of the Center for Stem  
501 Cell Biology (CA68485, DK20593).

502 **DATA & RESOURCE AVAILABILITY**

503 Authors are in the process of submitting RNA sequencing data to the Gene Expression  
504 Omnibus (GEO) database of the National Center for Biotechnology Information (NCBI).  
505 Additional datasets and materials generated during the current study are available from the  
506 corresponding author on reasonable request.

## REFERENCES

1. Brissova, M; Aamodt, K; Brahmachary, P; Prasad, N; Hong, J-Y; Dai, C; Mellati, M; Shostak, A; Poffenberger, G; Aramandla, R; et al. Islet Microenvironment, Modulated by Vascular Endothelial Growth Factor-A Signaling, Promotes  $\beta$  Cell Regeneration. *Cell Metab* **2014**, *19* (3), 498–511. <https://doi.org/10.1016/j.cmet.2014.02.001>.
2. Tsunawaki, S; Sporn, M; Ding, A; Nathan, C. Deactivation of Macrophages by Transforming Growth Factor- $\beta$ . *Nature* **1988**, *334* (6179), 260–262. <https://doi.org/10.1038/334260a0>.
3. Ricardo, SD; Goor, H van; Eddy, AA. Macrophage Diversity in Renal Injury and Repair. *J Clin Invest* **2008**, *118* (11), 3522–3530. <https://doi.org/10.1172/jci36150>.
4. He, H; Xu, J; Warren, CM; Duan, D; Li, X; Wu, L; Iruela-Arispe, ML. Endothelial Cells Provide an Instructive Niche for the Differentiation and Functional Polarization of M2-like Macrophages. *Blood* **2012**, *120* (15), 3152–3162. <https://doi.org/10.1182/blood-2012-04-422758>.
5. Sica, A; Mantovani, A. Macrophage Plasticity and Polarization: In Vivo Veritas. *J Clin Invest* **2012**, *122* (3), 787–795. <https://doi.org/10.1172/jci59643>.
6. Meier, JJ; Bhushan, A; Butler, AE; Rizza, RA; Butler, PC. Sustained Beta Cell Apoptosis in Patients with Long-Standing Type 1 Diabetes: Indirect Evidence for Islet Regeneration? *Diabetologia* **2005**, *48* (11), 2221–2228. <https://doi.org/10.1007/s00125-005-1949-2>.
7. Campbell-Thompson, ML; Atkinson, MA; Butler, AE; Chapman, NM; Frisk, G; Gianani, R; Giepmans, BN; Herrath, MG von; Hyöty, H; Kay, TW; et al. The Diagnosis of Insulinitis in Human Type 1 Diabetes. *Diabetologia* **2013**, *56* (11), 2541–2543. <https://doi.org/10.1007/s00125-013-3043-5>.
8. Halban, PA; Polonsky, KS; Bowden, DW; Hawkins, MA; Ling, C; Mather, KJ; Powers, AC; Rhodes, CJ; Sussel, L; Weir, GC.  $\beta$ -Cell Failure in Type 2 Diabetes: Postulated Mechanisms and Prospects for Prevention and Treatment. *Diabetes Care* **2014**, *37* (6), 1751–1758. <https://doi.org/10.2337/dc14-0396>.
9. Banaei-Bouchareb, L; Gouon-Evans, V; Samara-Boustani, D; Castellotti, MC; Czernichow, P; Pollard, JW; Polak, M. Insulin Cell Mass Is Altered in Csf1op/Csf1op Macrophage-Deficient Mice. *J Leukocyte Biol* **2004**, *76* (2), 359–367. <https://doi.org/10.1189/jlb.1103591>.
10. Mussar, K; Tucker, A; McLennan, L; Gearhart, A; Jimenez-Caliani, AJ; Cirulli, V; Crisa, L. Macrophage/Epithelium Cross-Talk Regulates Cell Cycle Progression and Migration in Pancreatic Progenitors. *Plos One* **2014**, *9* (2), e89492. <https://doi.org/10.1371/journal.pone.0089492>.
11. Xiao, X; Gaffar, I; Guo, P; Wiersch, J; Fischbach, S; Peirish, L; Song, Z; El-Gohary, Y; Prasad, K; Shiota, C; et al. M2 Macrophages Promote Beta-Cell Proliferation by up-Regulation of SMAD7. *Proc National Acad Sci* **2014**, *111* (13), E1211–20. <https://doi.org/10.1073/pnas.1321347111>.



12. Criscimanna, A; Coudriet, GM; Gittes, GK; Piganelli, JD; Esni, F. Activated Macrophages Create Lineage-Specific Microenvironments for Pancreatic Acinar- and  $\beta$ -Cell Regeneration in Mice. *Gastroenterology* **2014**, *147* (5), 1106 18.e11.  
<https://doi.org/10.1053/j.gastro.2014.08.008>.
13. Ding, B-S; Nolan, DJ; Butler, JM; James, D; Babazadeh, AO; Rosenwaks, Z; Mittal, V; Kobayashi, H; Shido, K; Lyden, D; et al. Inductive Angiocrine Signals from Sinusoidal Endothelium Are Required for Liver Regeneration. *Nature* **2010**, *468* (7321), 310 315.  
<https://doi.org/10.1038/nature09493>.
14. Butler, JM; Nolan, DJ; Vertes, EL; Varnum-Finney, B; Kobayashi, H; Hooper, AT; Seandel, M; Shido, K; White, IA; Kobayashi, M; et al. Endothelial Cells Are Essential for the Self-Renewal and Repopulation of Notch-Dependent Hematopoietic Stem Cells. *Cell Stem Cell* **2010**, *6* (3), 251–264. <https://doi.org/10.1016/j.stem.2010.02.001>.
15. Butler, JM; Kobayashi, H; Rafii, S. Instructive Role of the Vascular Niche in Promoting Tumour Growth and Tissue Repair by Angiocrine Factors. *Nat Rev Cancer* **2010**, *10* (2), 138 146. <https://doi.org/10.1038/nrc2791>.
16. Ding, B-S; Nolan, DJ; Guo, P; Babazadeh, AO; Cao, Z; Rosenwaks, Z; Crystal, RG; Simons, M; Sato, TN; Worgall, S; et al. Endothelial-Derived Angiocrine Signals Induce and Sustain Regenerative Lung Alveolarization. *Cell* **2011**, *147* (3), 539 553.  
<https://doi.org/10.1016/j.cell.2011.10.003>.
17. Cai, Q; Brissova, M; Reinert, RB; Pan, FC; Brahmachary, P; Jeansson, M; Shostak, A; Radhika, A; Poffenberger, G; Quaggin, SE; et al. Enhanced Expression of VEGF-A in  $\beta$  Cells Increases Endothelial Cell Number but Impairs Islet Morphogenesis and  $\beta$  Cell Proliferation. *Dev Biol* **2012**, *367* (1), 40 54. <https://doi.org/10.1016/j.ydbio.2012.04.022>.
18. Reinert, RB; Brissova, M; Shostak, A; Pan, FC; Poffenberger, G; Cai, Q; Hundemer, GL; Kantz, J; Thompson, CS; Dai, C; et al. Vascular Endothelial Growth Factor-A and Islet Vascularization Are Necessary in Developing, but Not Adult, Pancreatic Islets. *Diabetes* **2013**, *62* (12), 4154–4164. <https://doi.org/10.2337/db13-0071>.
19. Sand, FW; Hörnblad, A; Johansson, JK; Lorén, C; Edsbacke, J; Ståhlberg, A; Magenheimer, J; Ilovich, O; Mishani, E; Dor, Y; et al. Growth-Limiting Role of Endothelial Cells in Endoderm Development. *Dev Biol* **2011**, *352* (2), 267 277. <https://doi.org/10.1016/j.ydbio.2011.01.026>.
20. Hammar, E; Parnaud, G; Bosco, D; Perriraz, N; Maedler, K; Donath, M; Rouiller, DG; Halban, PA. Extracellular Matrix Protects Pancreatic  $\beta$ -Cells Against Apoptosis Role of Short- and Long-Term Signaling Pathways. *Diabetes* **2004**, *53* (8), 2034–2041.  
<https://doi.org/10.2337/diabetes.53.8.2034>.
21. Nikolova, G; Jabs, N; Konstantinova, I; Domogatskaya, A; Tryggvason, K; Sorokin, L; Fässler, R; Gu, G; Gerber, H-P; Ferrara, N; et al. The Vascular Basement Membrane: A Niche for Insulin Gene Expression and Beta Cell Proliferation. *Dev Cell* **2006**, *10* (3), 397 405.  
<https://doi.org/10.1016/j.devcel.2006.01.015>.

22. Diaferia, GR; Jimenez-Caliani, AJ; Ranjitkar, P; Yang, W; Hardiman, G; Rhodes, CJ; Crisa, L; Cirulli, V. B1 Integrin Is a Crucial Regulator of Pancreatic  $\beta$ -Cell Expansion. *Development* **2013**, *140* (16), 3360–3372. <https://doi.org/10.1242/dev.098533>.
23. Aamodt, KI; Powers, AC. Signals in the Pancreatic Islet Microenvironment Influence  $\beta$ -Cell Proliferation. *Diabetes Obes Metabolism* **2017**, *19* (S1), 124–136. <https://doi.org/10.1111/dom.13031>.
24. Göthert, JR; Gustin, SE; Eekelen, JAM van; Schmidt, U; Hall, MA; Jane, SM; Green, AR; Göttgens, B; Izon, DJ; Begley, CG. Genetically Tagging Endothelial Cells in Vivo: Bone Marrow-Derived Cells Do Not Contribute to Tumor Endothelium. *Blood* **2004**, *104* (6), 1769–1777. <https://doi.org/10.1182/blood-2003-11-3952>.
25. Zambrowicz, BP; Imamoto, A; Fiering, S; Herzenberg, LA; Kerr, WG; Soriano, P. Disruption of Overlapping Transcripts in the ROSA<sup>+</sup> Geo 26 Gene Trap Strain Leads to Widespread Expression of  $\beta$ -Galactosidase in Mouse Embryos and Hematopoietic Cells. *Proc National Acad Sci* **1997**, *94* (8), 3789–3794. <https://doi.org/10.1073/pnas.94.8.3789>.
26. Okabe, K; Kobayashi, S; Yamada, T; Kurihara, T; Tai-Nagara, I; Miyamoto, T; Mukoyama, Y; Sato, TN; Suda, T; Ema, M; et al. Neurons Limit Angiogenesis by Titrating VEGF in Retina. *Cell* **2014**, *159* (3), 584–596. <https://doi.org/10.1016/j.cell.2014.09.025>.
27. Carboneau, BA; Le, TDV; Dunn, JC; Gannon, M. Unexpected Effects of the MIP-CreER Transgene and Tamoxifen on  $\beta$ -Cell Growth in C57Bl6/J Male Mice. *Physiological Reports* **2016**, *4* (18), e12863. <https://doi.org/10.14814/phy2.12863>.
28. Luttun, A; Tjwa, M; Moons, L; Wu, Y; Angelillo-Scherrer, A; Liao, F; Nagy, JA; Hooper, A; Priller, J; Klerck, BD; et al. Revascularization of Ischemic Tissues by PlGF Treatment, and Inhibition of Tumor Angiogenesis, Arthritis and Atherosclerosis by Anti-Flt1. *Nat Med* **2002**, *8* (8), 831–840. <https://doi.org/10.1038/nm731>.
29. Takahashi, H; Shibuya, M. The Vascular Endothelial Growth Factor (VEGF)/VEGF Receptor System and Its Role under Physiological and Pathological Conditions. *Clin Sci* **2005**, *109* (3), 227–241. <https://doi.org/10.1042/cs20040370>.
30. Calderon, B; Carrero, JA; Ferris, ST; Sojka, DK; Moore, L; Epelman, S; Murphy, KM; Yokoyama, WM; Randolph, GJ; Unanue, ER. The Pancreas Anatomy Conditions the Origin and Properties of Resident Macrophages. *J Exp Medicine* **2015**, *212* (10), 1497–1512. <https://doi.org/10.1084/jem.20150496>.
31. Weitz, JR; Makhmutova, M; Almac¸a, J; Stertmann, J; Aamodt, K; Brissova, M; Speier, S; Rodriguez-Diaz, R; Caicedo, A. Mouse Pancreatic Islet Macrophages Use Locally Released ATP to Monitor Beta Cell Activity. *Diabetologia* **2018**, *61* (1), 182–192. <https://doi.org/10.1007/s00125-017-4416-y>.
32. Kragl, M; Lammert, E. The Islets of Langerhans; The Islets of Langerhans; Springer Netherlands, 2010; Vol. 654, pp 217–234. [https://doi.org/10.1007/978-90-481-3271-3\\_10](https://doi.org/10.1007/978-90-481-3271-3_10).
33. Bogdani, M. Thinking Outside the Cell: A Key Role for Hyaluronan in the Pathogenesis of Human Type 1 Diabetes. *Diabetes* **2016**, *65* (8), 2105–2114. <https://doi.org/10.2337/db15-1750>.

34. Schlaepfer, DD; Hanks, SK; Hunter, T; Geer, P van der. Integrin-Mediated Signal Transduction Linked to Ras Pathway by GRB2 Binding to Focal Adhesion Kinase. *Nature* **1994**, 372 (6508), 786–791. <https://doi.org/10.1038/372786a0>.
35. Foulds, CE; Nelson, ML; Blaszczak, AG; Graves, BJ. Ras/Mitogen-Activated Protein Kinase Signaling Activates Ets-1 and Ets-2 by CBP/P300 Recruitment†. *Mol Cell Biol* **2004**, 24 (24), 10954–10964. <https://doi.org/10.1128/mcb.24.24.10954-10964.2004>.
36. Carlson, SM; Chouinard, CR; Labadorf, A; Lam, CJ; Schmelzle, K; Fraenkel, E; White, FM. Large-Scale Discovery of ERK2 Substrates Identifies ERK-Mediated Transcriptional Regulation by ETV3. *Sci Signal* **2011**, 4 (196), rs11–rs11. <https://doi.org/10.1126/scisignal.2002010>.
37. Chen, H; Gu, X; Liu, Y; Wang, J; Wirt, SE; Bottino, R; Schorle, H; Sage, J; Kim, SK. PDGF Signalling Controls Age-Dependent Proliferation in Pancreatic  $\beta$ -Cells. *Nature* **2011**, 478 (7369), 349–355. <https://doi.org/10.1038/nature10502>.
38. Fiaschi-Taesch, N; Bigatel, TA; Sicari, B; Takane, KK; Salim, F; Velazquez-Garcia, S; Harb, G; Selk, K; Cozar-Castellano, I; Stewart, AF. Survey of the Human Pancreatic  $\beta$ -Cell G1/S Proteome Reveals a Potential Therapeutic Role for Cdk-6 and Cyclin D1 in Enhancing Human  $\beta$ -Cell Replication and Function In Vivo. *Diabetes* **2009**, 58 (4), 882–893. <https://doi.org/10.2337/db08-0631>.
39. Zhang, H; Zhang, J; Pope, CF; Crawford, LA; Vasavada, RC; Jagasia, SM; Gannon, M. Gestational Diabetes Mellitus Resulting From Impaired  $\beta$ -Cell Compensation in the Absence of FoxM1, a Novel Downstream Effector of Placental Lactogen. *Diabetes* **2009**, 59 (1), 143–152. <https://doi.org/10.2337/db09-0050>.
40. Karnik, SK; Hughes, CM; Gu, X; Rozenblatt-Rosen, O; McLean, GW; Xiong, Y; Meyerson, M; Kim, SK. Menin Regulates Pancreatic Islet Growth by Promoting Histone Methylation and Expression of Genes Encoding P27Kip1 and P18INK4c. *P Natl Acad Sci Usa* **2005**, 102 (41), 14659–14664. <https://doi.org/10.1073/pnas.0503484102>.
41. Shi, C; Pamer, EG. Monocyte Recruitment during Infection and Inflammation. *Nat Rev Immunol* **2011**, 11 (11), 762–774. <https://doi.org/10.1038/nri3070>.
42. Grunnet, LG; Aikin, R; Tonnesen, MF; Paraskevas, S; Blaabjerg, L; Størling, J; Rosenberg, L; Billestrup, N; Maysinger, D; Mandrup-Poulsen, T. Proinflammatory Cytokines Activate the Intrinsic Apoptotic Pathway in  $\beta$ -Cells. *Diabetes* **2009**, 58 (8), 1807–1815. <https://doi.org/10.2337/db08-0178>.
43. Jourdan, T; Godlewski, G; Cinar, R; Bertola, A; Szanda, G; Liu, J; Tam, J; Han, T; Mukhopadhyay, B; Skarulis, MC; et al. Activation of the Nlrp3 Inflammasome in Infiltrating Macrophages by Endocannabinoids Mediates Beta Cell Loss in Type 2 Diabetes. *Nat Med* **2013**, 19 (9), 1132–1140. <https://doi.org/10.1038/nm.3265>.
44. David, S; Kroner, A. Repertoire of Microglial and Macrophage Responses after Spinal Cord Injury. *Nat Rev Neurosci* **2011**, 12 (7), 388–399. <https://doi.org/10.1038/nrn3053>.

45. Zizzo, G; Hilliard, BA; Monestier, M; Cohen, PL. Efficient Clearance of Early Apoptotic Cells by Human Macrophages Requires M2c Polarization and MerTK Induction. *J Immunol* **2012**, 189 (7), 3508–3520. <https://doi.org/10.4049/jimmunol.1200662>.
46. Naito, Y; Takagi, T; Higashimura, Y. Heme Oxygenase-1 and Anti-Inflammatory M2 Macrophages. *Arch Biochem Biophys* **2014**, 564, 83–88. <https://doi.org/10.1016/j.abb.2014.09.005>.
47. Tessem, JS; Jensen, JN; Pelli, H; Dai, X-M; Zong, X-H; Stanley, ER; Jensen, J; DeGregori, J. Critical Roles for Macrophages in Islet Angiogenesis and Maintenance During Pancreatic Degeneration. *Diabetes* **2008**, 57 (6), 1605–1617. <https://doi.org/10.2337/db07-1577>.
48. Lammert, E. Induction of Pancreatic Differentiation by Signals from Blood Vessels. *Science* **2001**, 294 (5542), 564–567. <https://doi.org/10.1126/science.1064344>.
49. Lammert, E; Cleaver, O; Melton, D. Role of Endothelial Cells in Early Pancreas and Liver Development. *Mech Develop* **2003**, 120 (1), 59–64. [https://doi.org/10.1016/s0925-4773\(02\)00332-5](https://doi.org/10.1016/s0925-4773(02)00332-5).
50. Yoshitomi, H; Zaret, KS. Endothelial Cell Interactions Initiate Dorsal Pancreas Development by Selectively Inducing the Transcription Factor Ptf1a. *Development* **2004**, 131 (4), 807–817. <https://doi.org/10.1242/dev.00960>.
51. Zhang, N; Richter, A; Suriawinata, J; Harbaran, S; Altomonte, J; Cong, L; Zhang, H; Song, K; Meseck, M; Bromberg, J; et al. Elevated Vascular Endothelial Growth Factor Production in Islets Improves Islet Graft Vascularization. *Diabetes* **2004**, 53 (4), 963–970.
52. Narang, AS; Cheng, K; Henry, J; Zhang, C; Sabek, O; Fraga, D; Kotb, M; Gaber, AO; Mahato, RI. Vascular Endothelial Growth Factor Gene Delivery for Revascularization in Transplanted Human Islets. *Pharmaceut Res* **2004**, 21 (1), 15–25. <https://doi.org/10.1023/b:pham.0000012147.52900.b8>.
53. Lai, Y; Schneider, D; Kieszun, A; Hauck-Schmalenberger, I; Breier, G; Brandhorst, D; Brandhorst, H; Iken, M; Brendel, MD; Bretzel, RG; et al. Vascular Endothelial Growth Factor Increases Functional Beta-Cell Mass by Improvement of Angiogenesis of Isolated Human and Murine Pancreatic Islets. *Transplantation* **2005**, 79 (11), 1530–1536. <https://doi.org/10.1097/01.tp.0000163506.40189.65>.
54. Phelps, EA; Templeman, KL; Thulé, PM; García, AJ. Engineered VEGF-Releasing PEG-MAL Hydrogel for Pancreatic Islet Vascularization. *Drug Deliv Transl Re* **2015**, 5 (2), 125–136. <https://doi.org/10.1007/s13346-013-0142-2>.
55. Weber, LM; Hayda, KN; Anseth, KS. Cell–Matrix Interactions Improve  $\beta$ -Cell Survival and Insulin Secretion in Three-Dimensional Culture. *Tissue Eng Pt A* **2008**, 14 (12), 1959–1968. <https://doi.org/10.1089/ten.tea.2007.0238>.
56. Cucak, H; Grunnet, LG; Rosendahl, A. Accumulation of M1-like Macrophages in Type 2 Diabetic Islets Is Followed by a Systemic Shift in Macrophage Polarization. *J Leukocyte Biol* **2014**, 95 (1), 149–160. <https://doi.org/10.1189/jlb.0213075>.

57. Lavin, Y; Winter, D; Blecher-Gonen, R; David, E; Keren-Shaul, H; Merad, M; Jung, S; Amit, I. Tissue-Resident Macrophage Enhancer Landscapes Are Shaped by the Local Microenvironment. *Cell* **2014**, *159* (6), 1312–1326. <https://doi.org/10.1016/j.cell.2014.11.018>.
58. Stout, RD; Jiang, C; Matta, B; Tietzel, I; Watkins, SK; Suttles, J. Macrophages Sequentially Change Their Functional Phenotype in Response to Changes in Microenvironmental Influences. *J Immunol* **2005**, *175* (1), 342–349. <https://doi.org/10.4049/jimmunol.175.1.342>.
59. Gassen, NV; Overmeire, EV; Leuckx, G; Heremans, Y; Groef, SD; Cai, Y; Elkrin, Y; Gysemans, C; Stijlemans, B; Castele, MV de; et al. Macrophage Dynamics Are Regulated by Local Macrophage Proliferation and Monocyte Recruitment in Injured Pancreas. *Eur J Immunol* **2015**, *45* (5), 1482–1493. <https://doi.org/10.1002/eji.201445013>.
60. Parnaud, G; Hammar, E; Ribaux, P; Donath, MY; Berney, T; Halban, PA. Signaling Pathways Implicated in the Stimulation of  $\beta$ -Cell Proliferation by Extracellular Matrix. *J Clin Endocrinol Metabolism* **2009**, *94* (7), 2672–2672. <https://doi.org/10.1210/jcem.94.7.9995>.
61. Liu, J; Liu, S; Chen, Y; Zhao, X; Lu, Y; Cheng, J. Functionalized Self-Assembling Peptide Improves INS-1  $\beta$ -Cell Function and Proliferation via the Integrin/FAK/ERK/Cyclin Pathway. *Int J Nanomed* **2015**, *Volume 10* (1), 3519–3531. <https://doi.org/10.2147/ijn.s80502>.
62. Peart, J; Li, J; Lee, H; Riopel, M; Feng, Z-C; Wang, R. Critical Role of B1 Integrin in Postnatal Beta-Cell Function and Expansion. *Oncotarget* **2017**, *8* (38), 62939–62952. <https://doi.org/10.18632/oncotarget.17969>.
63. Mohammed, FF; Pennington, CJ; Kassiri, Z; Rubin, JS; Soloway, PD; Ruther, U; Edwards, DR; Khokha, R. Metalloproteinase Inhibitor TIMP-1 Affects Hepatocyte Cell Cycle via HGF Activation in Murine Liver Regeneration. *Hepatology* **2005**, *41* (4), 857–867. <https://doi.org/10.1002/hep.20618>.
64. Kveiborg, M; Albrechtsen, R; Couchman, JR; Wewer, UM. Cellular Roles of ADAM12 in Health and Disease. *Int J Biochem Cell Biology* **2008**, *40* (9), 1685–1702. <https://doi.org/10.1016/j.biocel.2008.01.025>.
65. Apte, SS. A Disintegrin-like and Metalloprotease (Reprolysin-Type) with Thrombospondin Type 1 Motif (ADAMTS) Superfamily: Functions and Mechanisms. *J Biol Chem* **2009**, *284* (46), 31493–31497. <https://doi.org/10.1074/jbc.r109.052340>.
66. Townsend, SE; Gannon, M. Extracellular Matrix–Associated Factors Play Critical Roles in Regulating Pancreatic  $\beta$ -Cell Proliferation and Survival. *Endocrinology* **2019**, *160* (8), 1885–1894. <https://doi.org/10.1210/en.2019-00206>.
67. Coudriet, GM; He, J; Trucco, M; Mars, WM; Piganelli, JD. Hepatocyte Growth Factor Modulates Interleukin-6 Production in Bone Marrow Derived Macrophages: Implications for Inflammatory Mediated Diseases. *Plos One* **2010**, *5* (11), e15384. <https://doi.org/10.1371/journal.pone.0015384>.
68. Song, I; Patel, O; Himpe, E; Muller, CJF; Bouwens, L. Beta Cell Mass Restoration in Alloxan-Diabetic Mice Treated with EGF and Gastrin. *Plos One* **2015**, *10* (10), e0140148. <https://doi.org/10.1371/journal.pone.0140148>.

69. Sicari, BM; Dziki, JL; Siu, BF; Medberry, CJ; Dearth, CL; Badylak, SF. The Promotion of a Constructive Macrophage Phenotype by Solubilized Extracellular Matrix. *Biomaterials* **2014**, 35 (30), 8605–8612. <https://doi.org/10.1016/j.biomaterials.2014.06.060>.
70. Brown, BN; Sicari, BM; Badylak, SF. Rethinking Regenerative Medicine: A Macrophage-Centered Approach. *Front Immunol* **2014**, 5 (8), 510. <https://doi.org/10.3389/fimmu.2014.00510>.
71. Chen, P; Cescon, M; Zuccolotto, G; Nobbio, L; Colombelli, C; Filafarro, M; Vitale, G; Feltri, ML; Bonaldo, P. Collagen VI Regulates Peripheral Nerve Regeneration by Modulating Macrophage Recruitment and Polarization. *Acta Neuropathol* **2015**, 129 (1), 97–113. <https://doi.org/10.1007/s00401-014-1369-9>.
72. Kim, H; Cha, J; Jang, M; Kim, P. Hyaluronic Acid-Based Extracellular Matrix Triggers Spontaneous M2-like Polarity of Monocyte/Macrophage. *Biomater Sci-uk* **2019**, 7 (6), 2264–2271. <https://doi.org/10.1039/c9bm00155g>.
73. Guney, MA; Petersen, CP; Boustani, A; Duncan, MR; Gunasekaran, U; Menon, R; Warfield, C; Grotendorst, GR; Means, AL; Economides, AN; et al. Connective Tissue Growth Factor Acts within Both Endothelial Cells and Beta Cells to Promote Proliferation of Developing Beta Cells. *Proc National Acad Sci* **2011**, 108 (37), 15242–15247. <https://doi.org/10.1073/pnas.1100072108>.
74. Kulkarni, RN; Mizrahi, E-B; Ocana, AG; Stewart, AF. Human  $\beta$ -Cell Proliferation and Intracellular Signaling Driving in the Dark Without a Road Map. *Diabetes* **2012**, 61 (9), 2205–2213. <https://doi.org/10.2337/db12-0018>.
75. Riley, KG; Pasek, RC; Maulis, MF; Peek, J; Thorel, F; Brigstock, DR; Herrera, PL; Gannon, M. Connective Tissue Growth Factor Modulates Adult  $\beta$ -Cell Maturity and Proliferation to Promote  $\beta$ -Cell Regeneration in Mice. *Diabetes* **2015**, 64 (4), 1284–1298. <https://doi.org/10.2337/db14-1195>.
76. Brissova, M; Shostak, A; Shiota, M; Wiebe, PO; Poffenberger, G; Kantz, J; Chen, Z; Carr, C; Jerome, WG; Chen, J; et al. Pancreatic Islet Production of Vascular Endothelial Growth Factor—a Is Essential for Islet Vascularization, Revascularization, and Function. *Diabetes* **2006**, 55 (11), 2974–2985. <https://doi.org/10.2337/db06-0690>.
77. Nyman, LR; Wells, KS; Head, WS; McCaughey, M; Ford, E; Brissova, M; Piston, DW; Powers, AC. Real-Time, Multidimensional in Vivo Imaging Used to Investigate Blood Flow in Mouse Pancreatic Islets. *J Clin Investigation* **2008**, 118 (11), 3790–3797. <https://doi.org/10.1172/jci36209>.
78. Efrat, S; Fusco-DeMane, D; Lemberg, H; Emran, O al; Wang, X. Conditional Transformation of a Pancreatic Beta-Cell Line Derived from Transgenic Mice Expressing a Tetracycline-Regulated Oncogene. *Proceedings of the National Academy of Sciences* **1995**, 92 (8), 3576–3580.
79. Milo-Landesman, D; Surana, M; Berkovich, I; Compagni, A; Christofori, G; Fleischer, N; Efrat, S. Correction of Hyperglycemia in Diabetic Mice Transplanted with Reversibly Immortalized Pancreatic Beta Cells Controlled by the Tet-on Regulatory System. *Cell Transplant* **2001**, 10 (7), 645–650. <https://doi.org/10.3727/000000001783986422>.

80. Ohno-Matsui, K; Hirose, A; Yamamoto, S; Saikia, J; Okamoto, N; Gehlbach, P; Duh, EJ; Hackett, S; Chang, M; Bok, D; et al. Inducible Expression of Vascular Endothelial Growth Factor in Adult Mice Causes Severe Proliferative Retinopathy and Retinal Detachment. *Am J Pathology* **2002**, *160* (2), 711–719. [https://doi.org/10.1016/s0002-9440\(10\)64891-2](https://doi.org/10.1016/s0002-9440(10)64891-2).
81. Hara, M; Wang, X; Kawamura, T; Bindokas, VP; Dizon, RF; Alcoser, SY; Magnuson, MA; Bell, GI. Transgenic Mice with Green Fluorescent Protein-Labeled Pancreatic  $\beta$ -Cells. *Am J Physiol-endoc M* **2003**, *284* (1), E177–E183. <https://doi.org/10.1152/ajpendo.00321.2002>.
82. Mortazavi, A; Williams, BA; McCue, K; Schaeffer, L; Wold, B. Mapping and Quantifying Mammalian Transcriptomes by RNA-Seq. *Nat Methods* **2008**, *5* (7), 621–628. <https://doi.org/10.1038/nmeth.1226>.
83. Malone, JH; Oliver, B. Microarrays, Deep Sequencing and the True Measure of the Transcriptome. *Bmc Biol* **2011**, *9* (1), 34. <https://doi.org/10.1186/1741-7007-9-34>.
84. Trapnell, C; Pachter, L; Salzberg, SL. TopHat: Discovering Splice Junctions with RNA-Seq. *Bioinformatics* **2009**, *25* (9), 1105–1111. <https://doi.org/10.1093/bioinformatics/btp120>.
85. Robinson, MD; Oshlack, A. A Scaling Normalization Method for Differential Expression Analysis of RNA-Seq Data. *Genome Biol* **2010**, *11* (3), R25. <https://doi.org/10.1186/gb-2010-11-3-r25>.
86. Dillies, M-A; Rau, A; Aubert, J; Hennequet-Antier, C; Jeanmougin, M; Servant, N; Keime, C; Marot, G; Castel, D; Estelle, J; et al. A Comprehensive Evaluation of Normalization Methods for Illumina High-Throughput RNA Sequencing Data Analysis. *Brief Bioinform* **2013**, *14* (6), 671–683. <https://doi.org/10.1093/bib/bbs046>.
87. Benjamini, Y; Hochberg, Y. Controlling the False Discovery Rate: A Practical and Powerful Approach to Multiple Testing. *Journal of the Royal Statistical Society, Series B Methodological* **1995**, *57*, 289–300.
88. Huang, DW; Sherman, BT; Zheng, X; Yang, J; Imamichi, T; Stephens, R; Lempicki, RA. Extracting Biological Meaning from Large Gene Lists with DAVID. *Curr Protoc Bioinform* **2009**, *Chapter 13* (1), Unit 13.11–13.11.13. <https://doi.org/10.1002/0471250953.bi1311s27>.

## SUPPLEMENTAL FIGURES

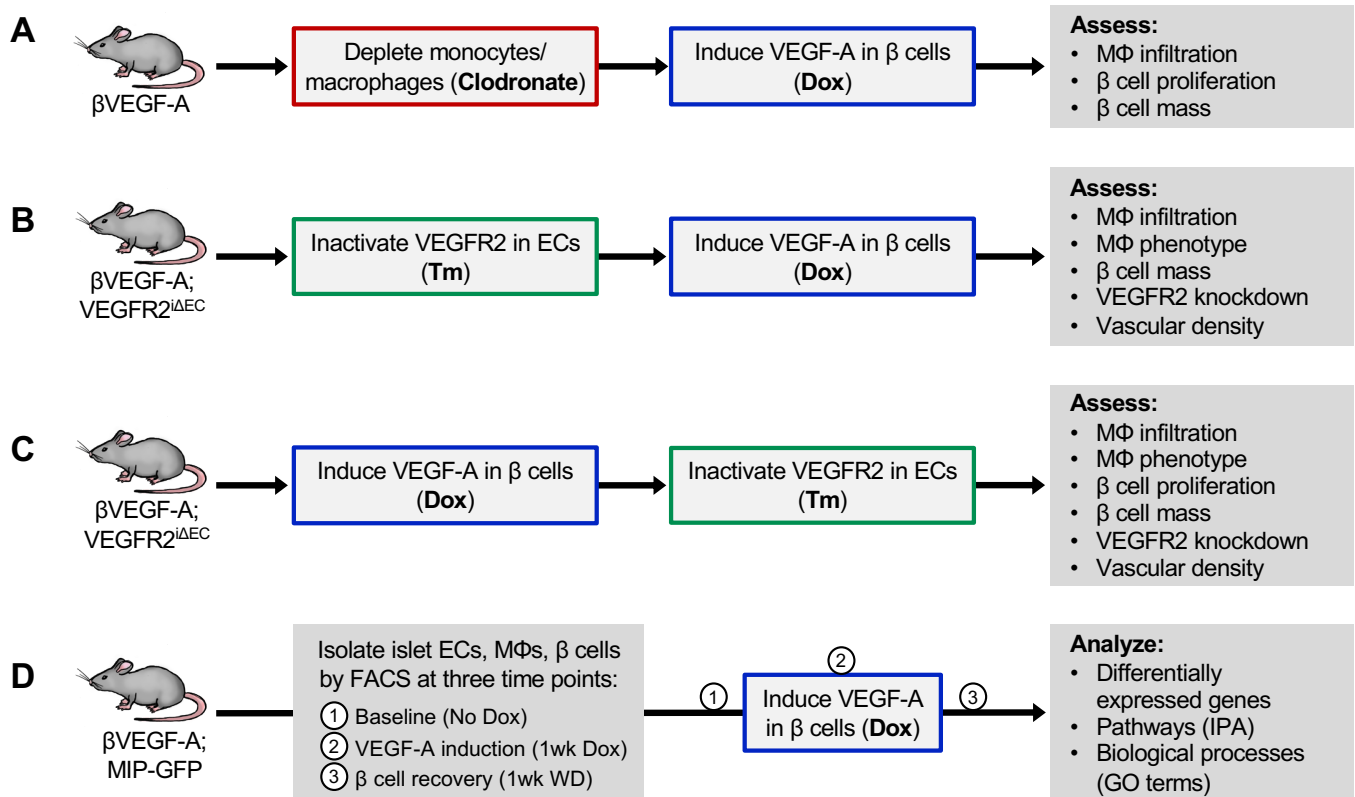

**Figure S1. Schematic representation of experiments to determine the role of macrophages and endothelial cells in the  $\beta$ VEGF-A mouse model.** (A) Clodronate liposomes were used to suppress macrophage (M $\Phi$ ) infiltration, followed by administration of doxycycline (Dox) to overexpress VEGF-A in  $\beta$  cells. (B–C) To modulate endothelial cells (ECs), an inducible EC-specific VEGFR2 knockout mouse model Cd5-CreER; VEGFR2<sup>fl/fl</sup> (VEGFR2<sup>iAEC</sup>)<sup>26</sup> was bred into the  $\beta$ VEGF-A line. Tamoxifen (Tm) was used to inactivate VEGFR2 in ECs either prior to (B) or after (C) VEGF-A induction to discern the role of proliferative and quiescent ECs, respectively, in the  $\beta$  cell loss and recovery. (D) ECs, M $\Phi$ s, and  $\beta$  cells were isolated from  $\beta$ VEGF-A mice at three time points; introduction of the MIP-GFP transgene facilitated  $\beta$  cell sorting. For additional details, see **Methods**.



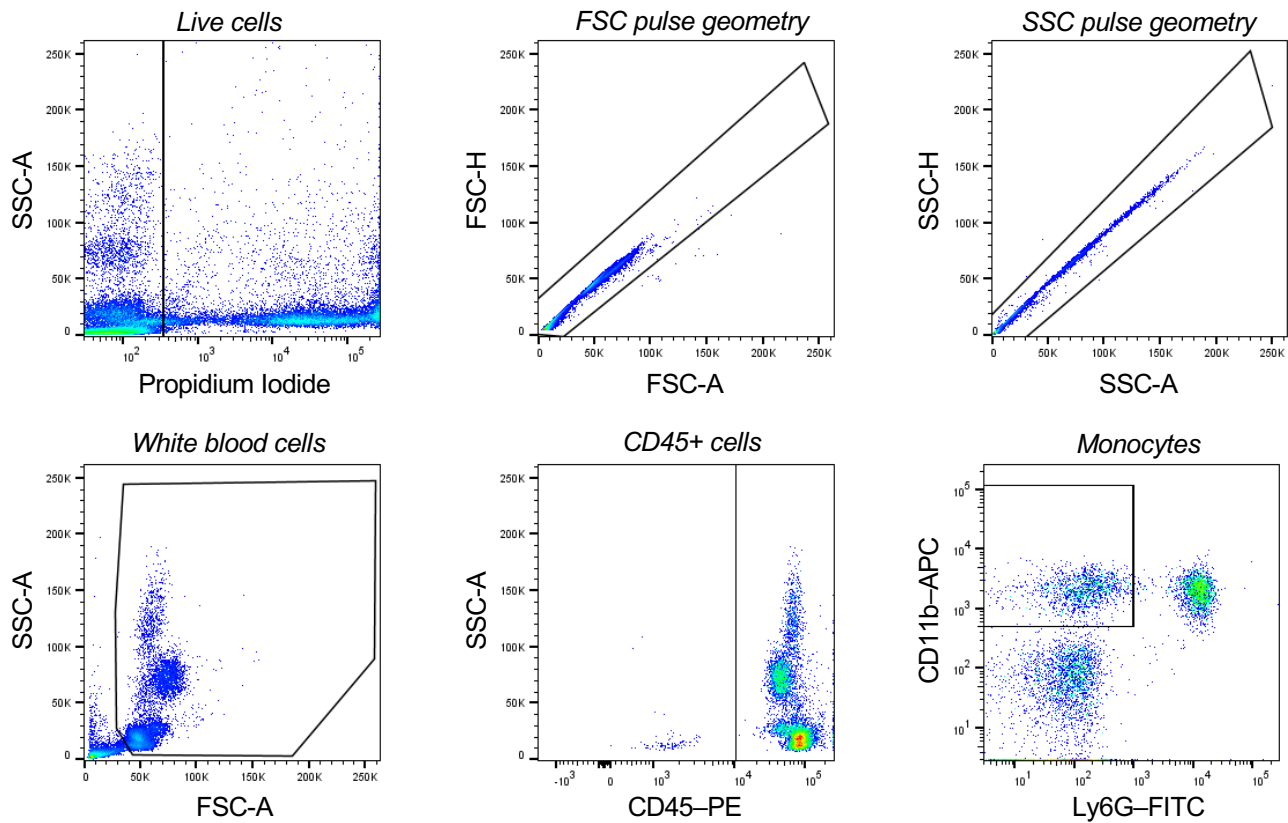

**Figure S2. Gating strategy for flow cytometry analysis of circulating monocytes.** Peripheral blood (50-100  $\mu$ l) was collected from the retro-orbital sinus of  $\beta$ VEGF-A mice to assess monocyte depletion following clodronate treatment. Cell debris were excluded by forward scatter (FSC) and side scatter (SSC), single cells were identified by voltage pulse geometry, and non-viable cells were excluded using propidium iodide. From remaining white blood cells, CD45 was used as a pan-leukocyte marker and monocytes were identified by a CD11b<sup>+</sup> Ly6G<sup>-</sup> profile. Approximately 10,000 white blood cells were analyzed and quantified per each animal. See also **Figure 2B**.

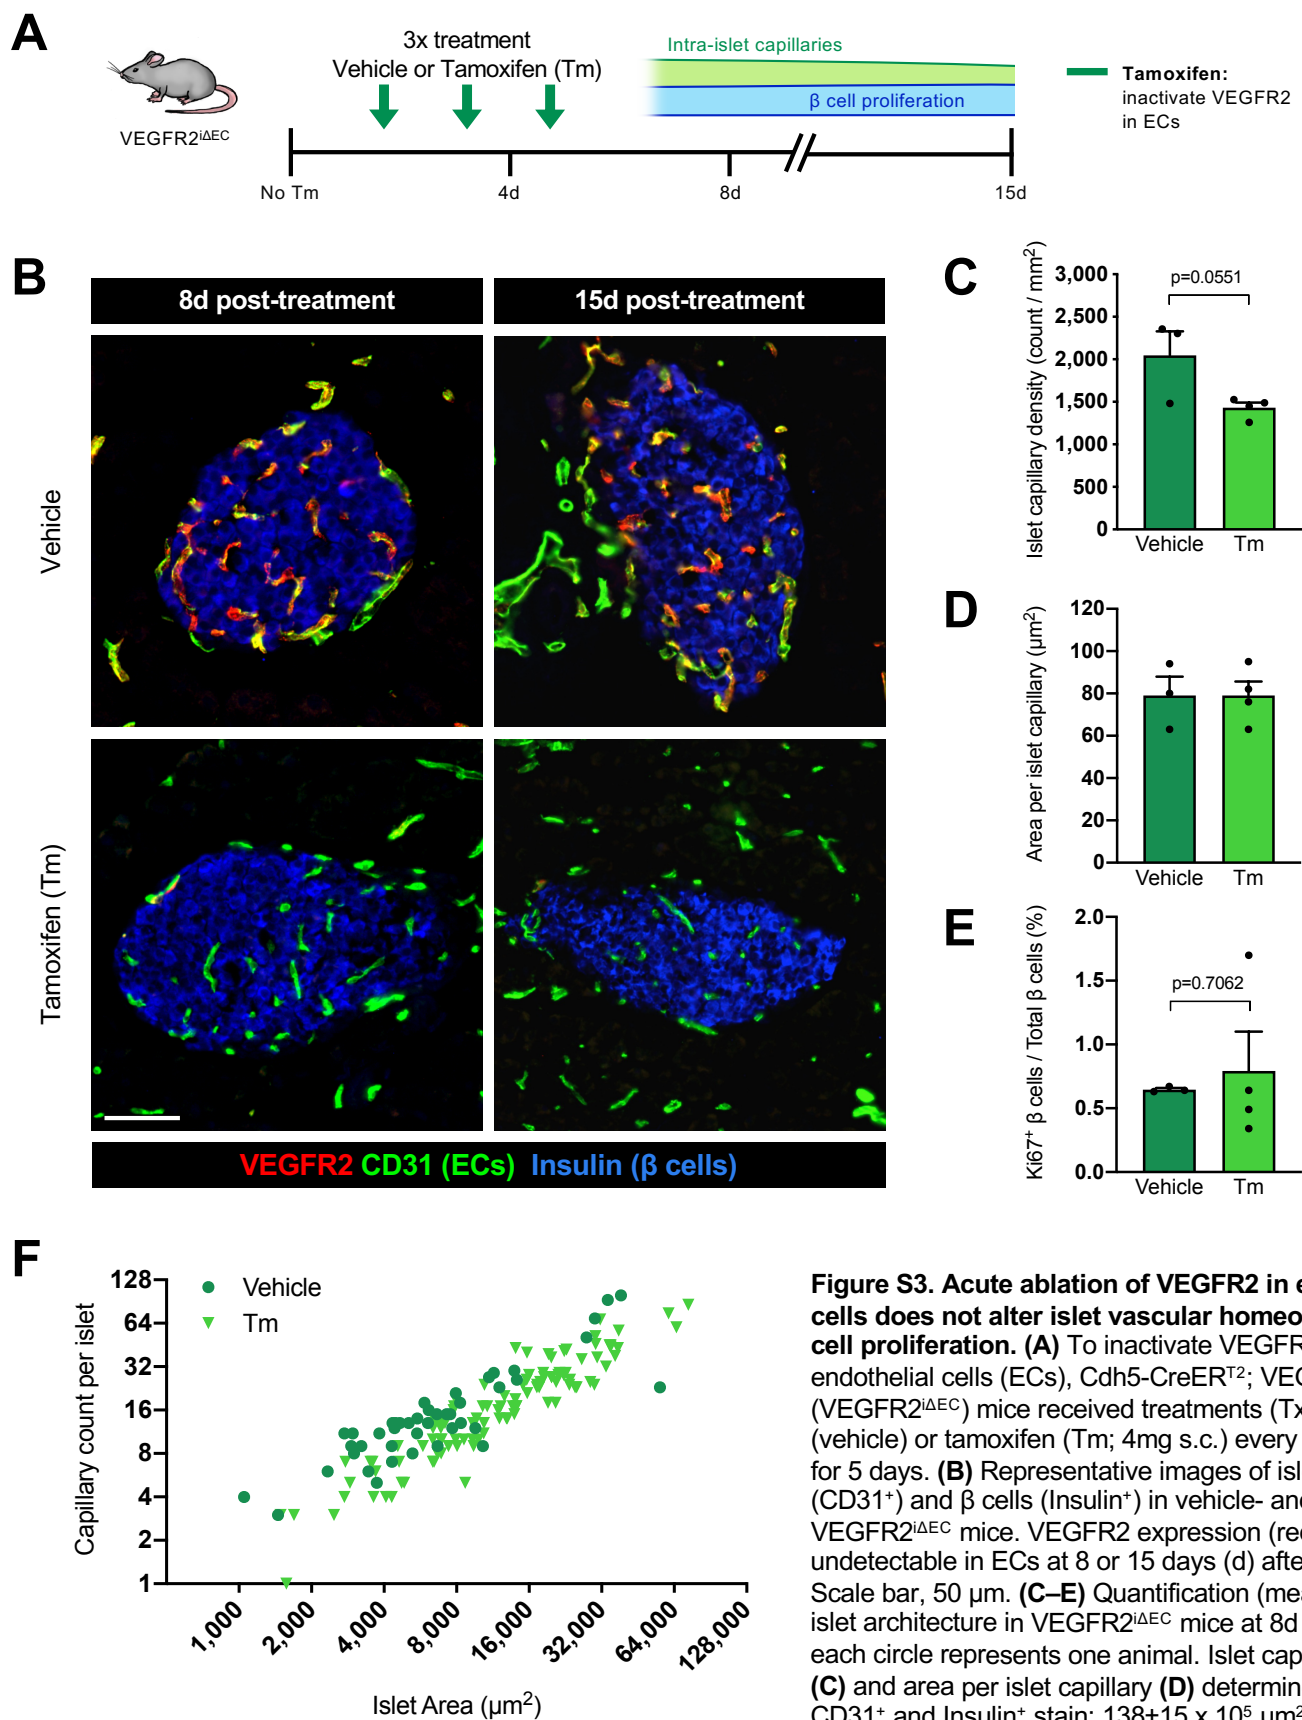

**Figure S3. Acute ablation of VEGFR2 in endothelial cells does not alter islet vascular homeostasis or  $\beta$  cell proliferation.** (A) To inactivate VEGFR2 in endothelial cells (ECs), *Cdh5-CreER<sup>T2</sup>; VEGFR2<sup>fl/fl</sup>* (*VEGFR2<sup>ΔEC</sup>*) mice received treatments (Tx) of corn oil (vehicle) or tamoxifen (Tm; 4mg s.c.) every other day for 5 days. (B) Representative images of islet ECs (CD31<sup>+</sup>) and  $\beta$  cells (Insulin<sup>+</sup>) in vehicle- and Tm-treated *VEGFR2<sup>ΔEC</sup>* mice. VEGFR2 expression (red) is virtually undetectable in ECs at 8 or 15 days (d) after initial Tx. Scale bar, 50  $\mu$ m. (C–E) Quantification (mean $\pm$ SEM) of islet architecture in *VEGFR2<sup>ΔEC</sup>* mice at 8d post-Tx; each circle represents one animal. Islet capillary density (C) and area per islet capillary (D) determined by CD31<sup>+</sup> and Insulin<sup>+</sup> stain;  $138\pm 15 \times 10^5 \mu\text{m}^2$  total islet area analyzed per animal. (E) Basal  $\beta$  cell proliferation rate;  $1,892\pm 259$  cells counted per animal. Statistics shown in (C) and (E) reflect unpaired two-tailed t-tests. (F) In both vehicle- and Tm-treated mice, the number of islet capillaries increases proportionately with islet size. Note both axes have a base 2 logarithmic scale.

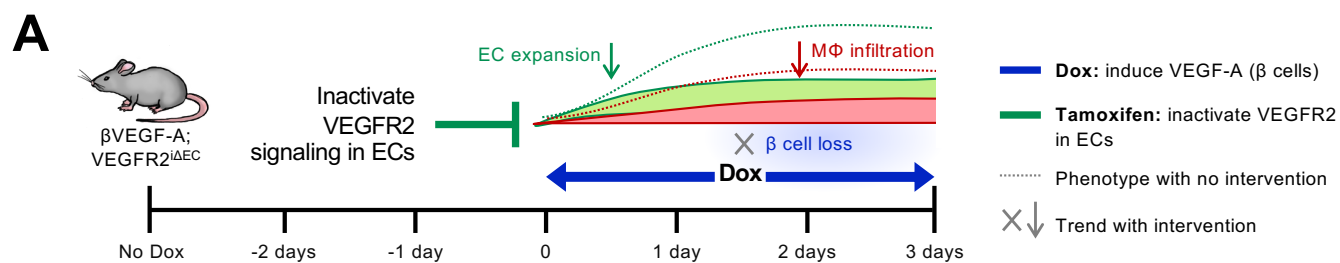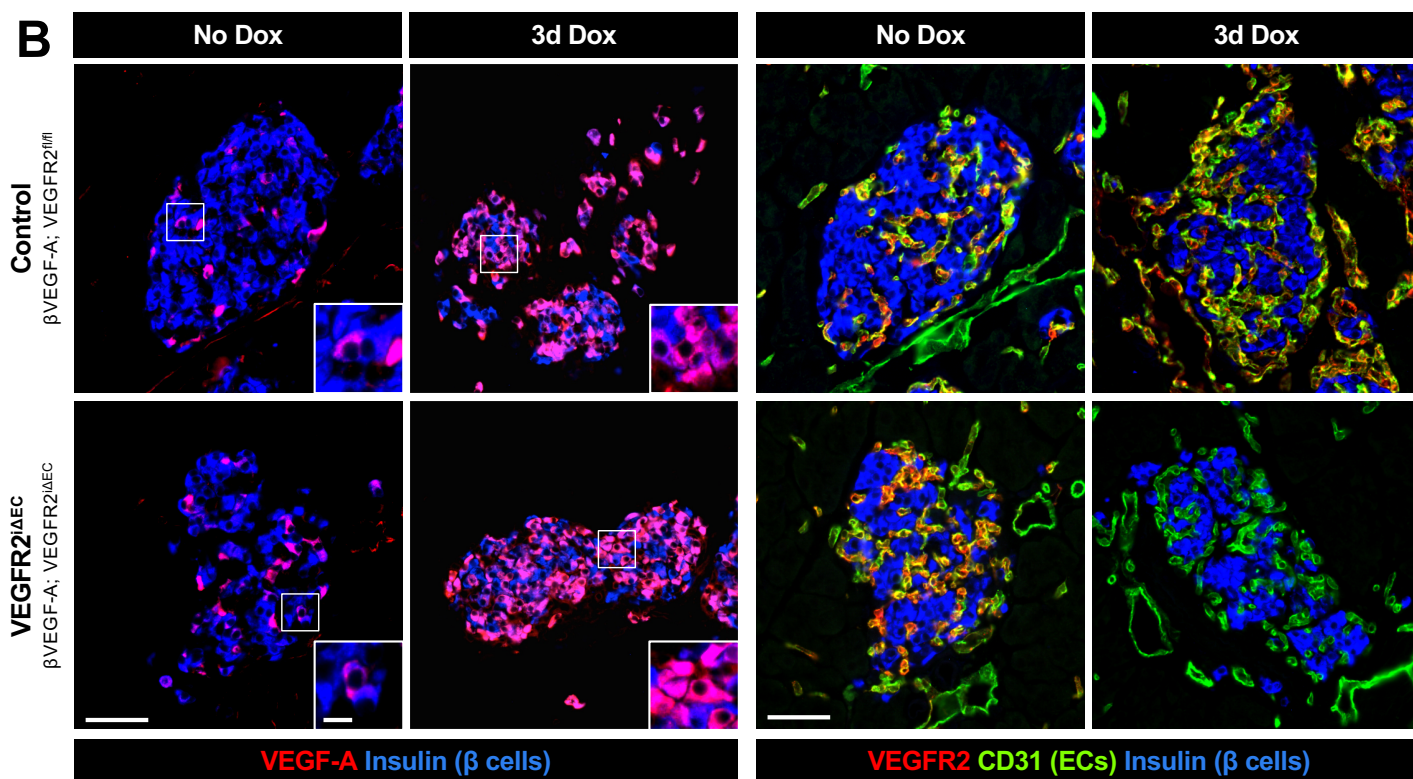

**Figure S4. Effective VEGFR2 inactivation in endothelial cells prevents islet capillary expansion by acute elevation of VEGF-A in the islet microenvironment. (A)** To inactivate VEGFR2 in endothelial cells (ECs), βVEGF-A; R2<sup>ΔEC</sup> mice and βVEGF-A; R2<sup>fl/fl</sup> controls were treated with Tamoxifen (Tm; 4mg s.c.) prior to VEGF-A induction. **(B)** Left panel: induction of VEGFA expression at 3d Dox compared to baseline (No Dox) in βVEGF-A; R2<sup>ΔEC</sup> mice and controls; VEGF-A (red); β cells (Insulin<sup>+</sup>, blue). Boxes indicate regions enlarged in insets. Right panel: inactivation of VEGFR2 expression in ECs at baseline and 3d Dox; VEGFR2 (red), ECs (CD31<sup>+</sup>, green); β cells (Insulin<sup>+</sup>, blue). Scale bars, 50 μm; inset, 10 μm.

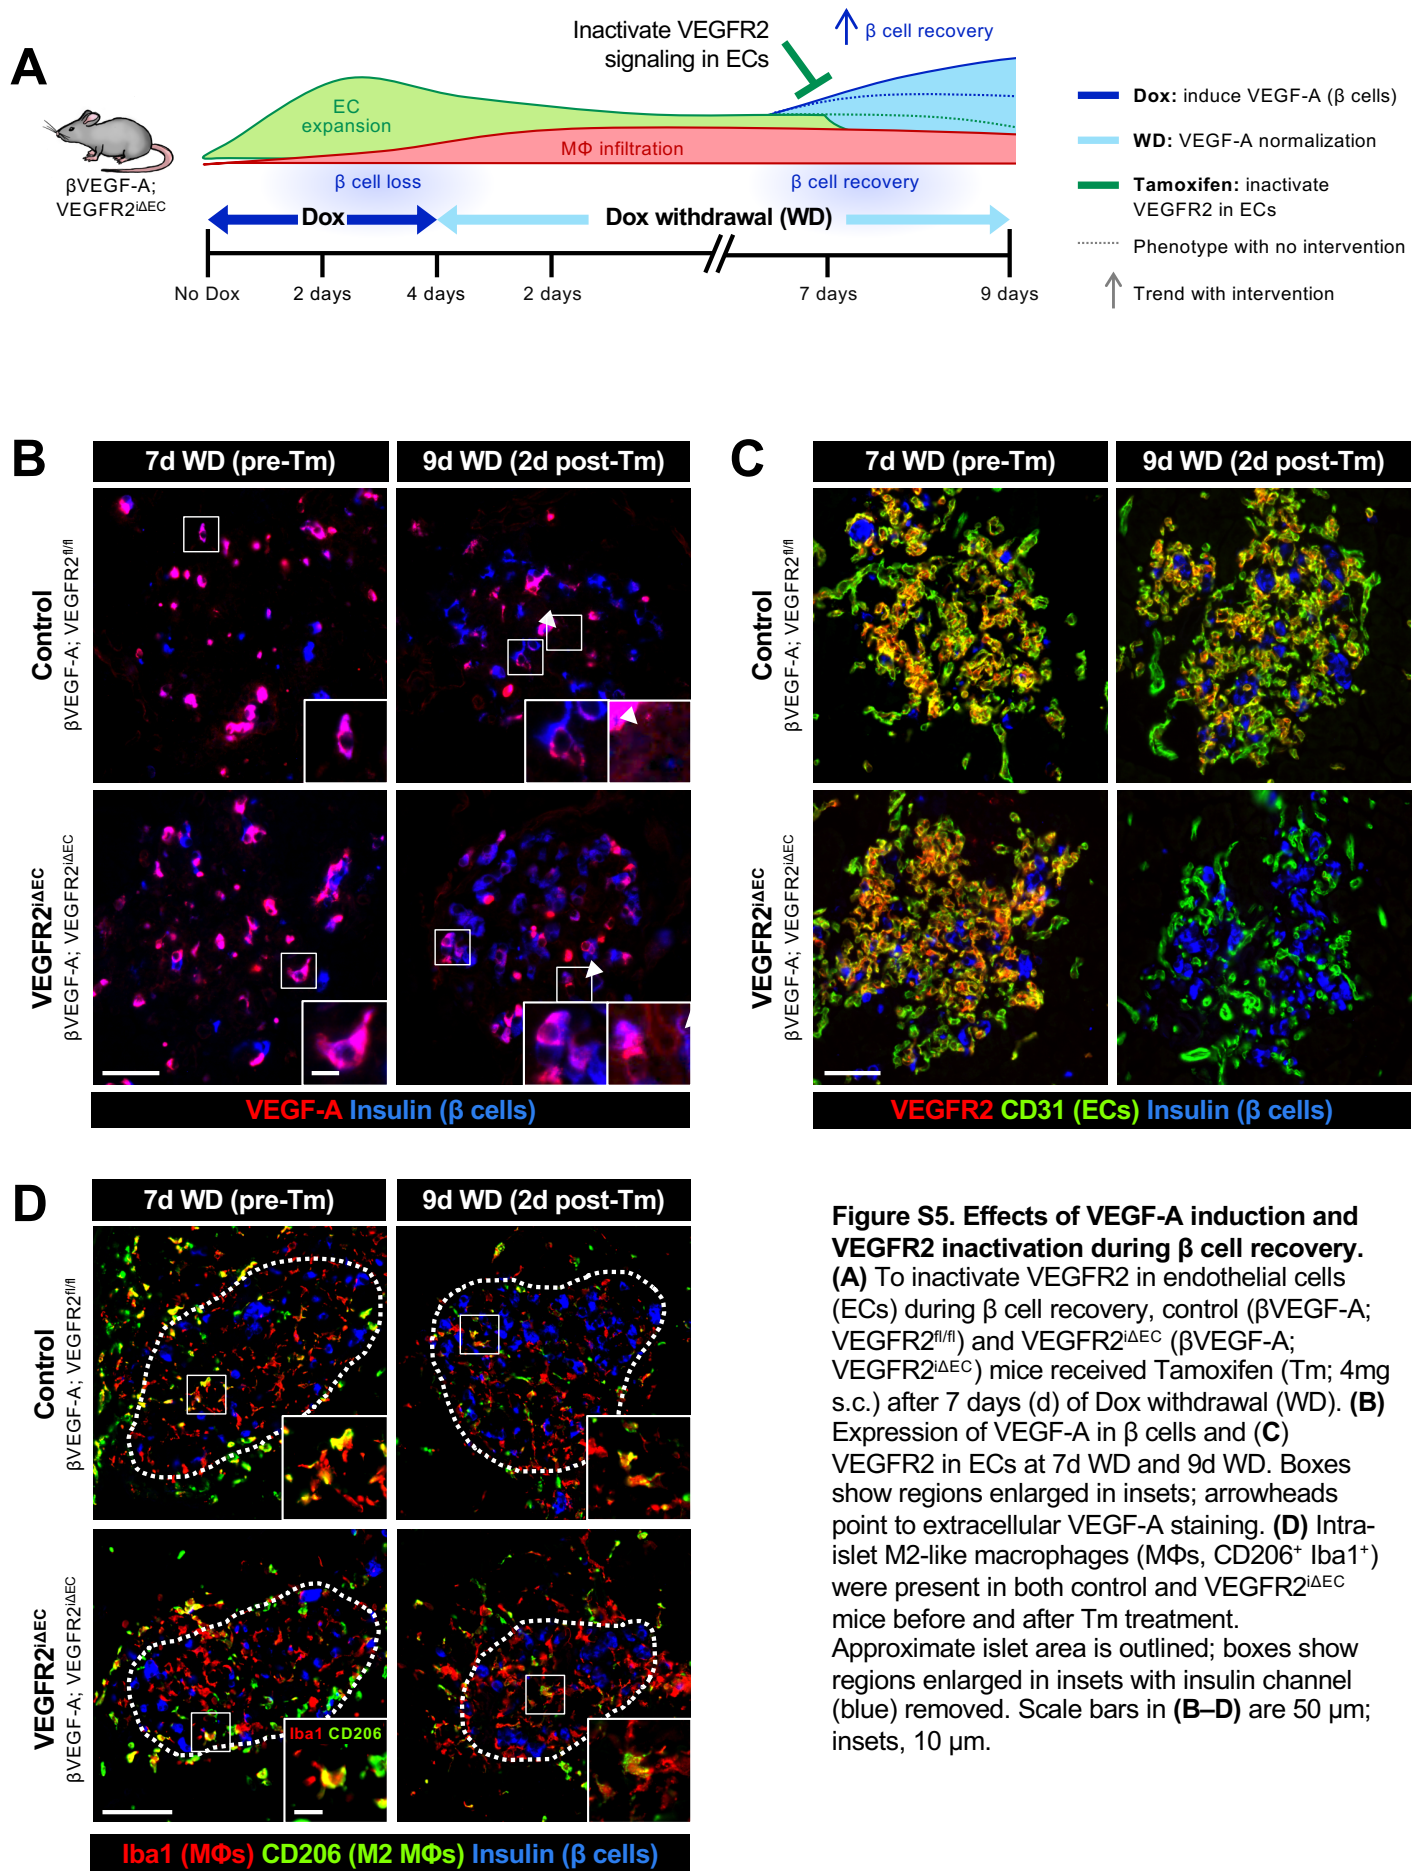

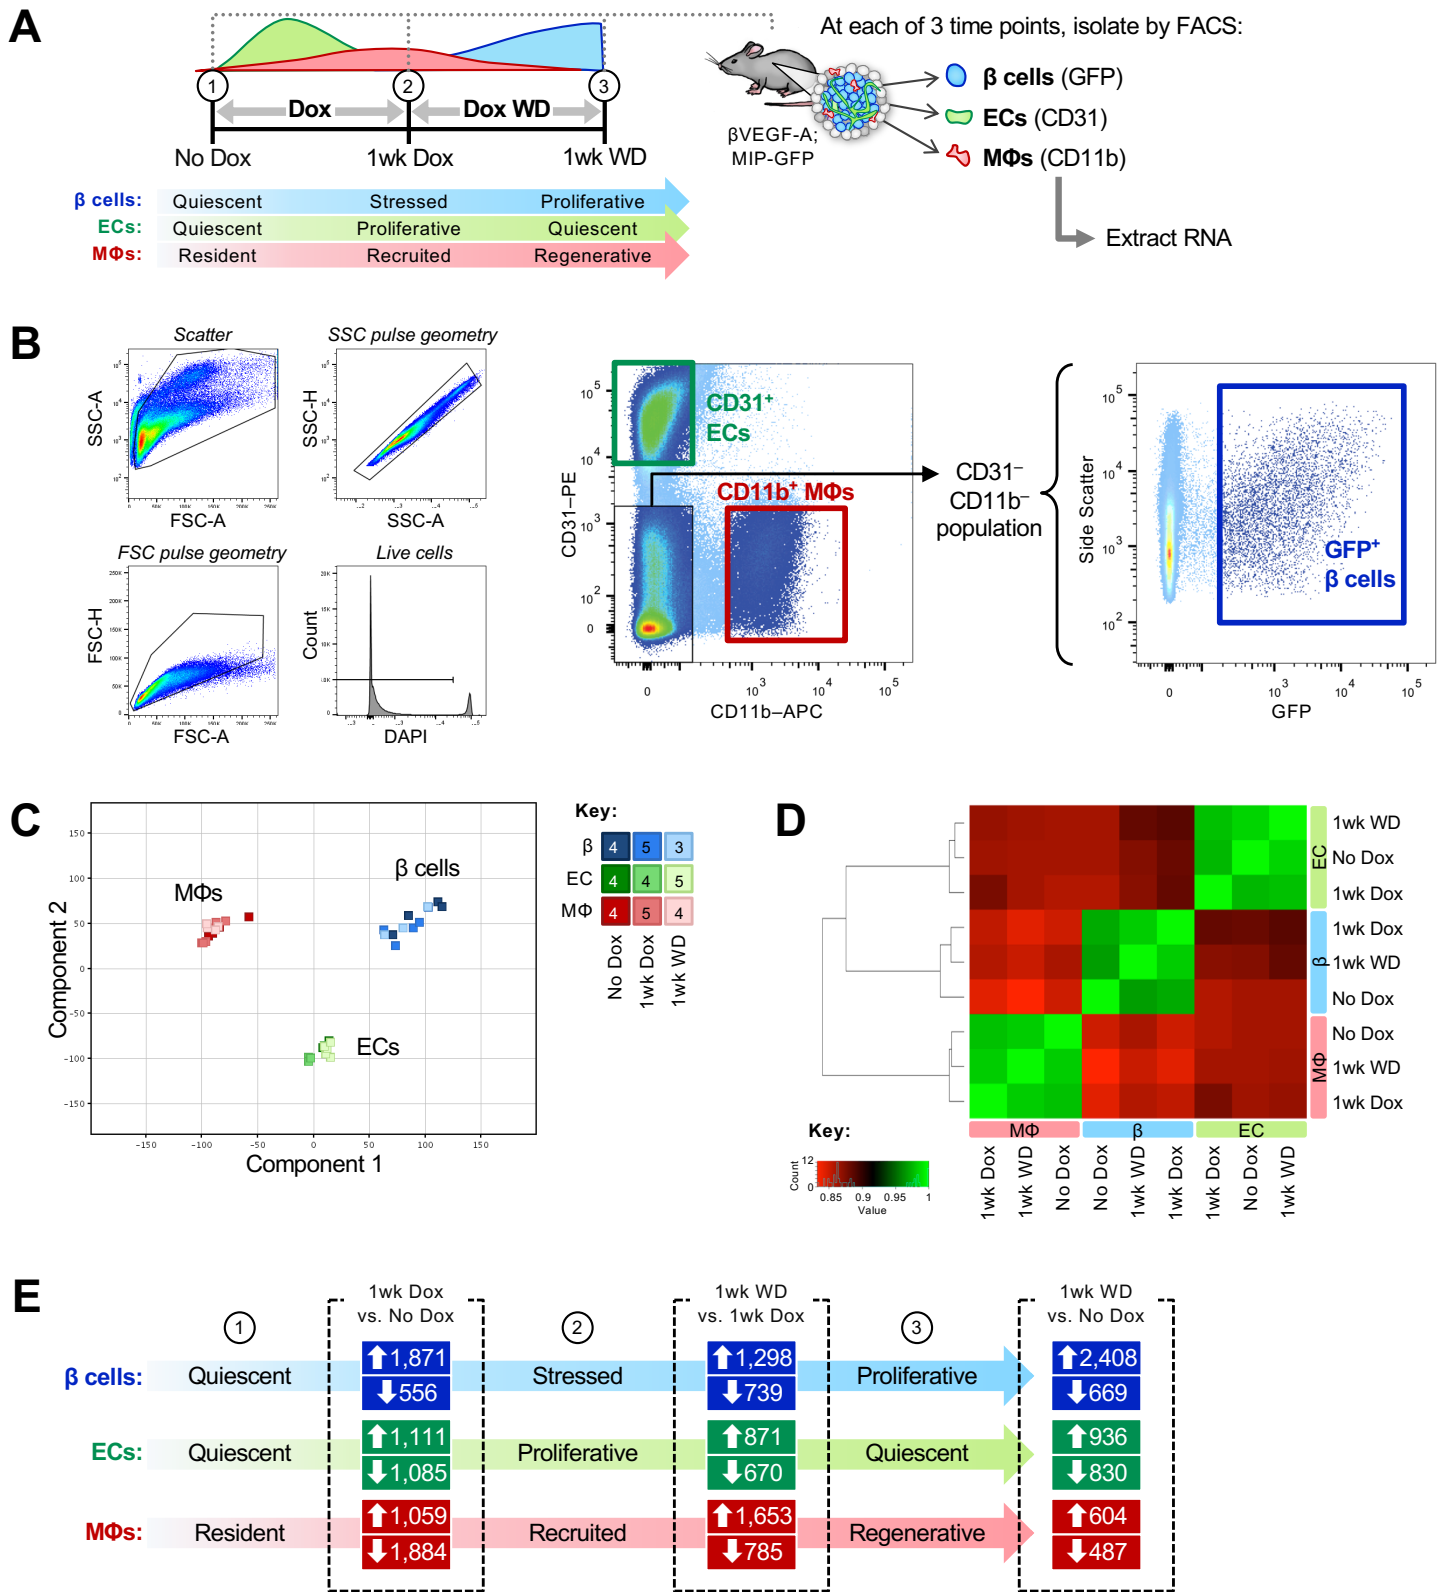

**Figure S6. Transcriptome analysis demonstrates unique gene expression profiles in β cells, endothelial cells and macrophages purified from islets during the period of β cell loss and recovery. (A–B)** Dispersed islet cells from βVEGF-A; MIP-GFP mice were immunolabeled with fluorophore-conjugated anti-CD31 and anti-CD11b antibodies to separate endothelial cell (EC) and macrophage (MΦ) populations, respectively. GFP<sup>+</sup> β cells were sorted from the CD31<sup>-</sup> CD11b<sup>-</sup> population. Initial gating is shown in first four plots. **(C)** Principal component analysis (PCA) plot shows the clustering of samples from sorted β cells (blue), ECs (green), and MΦs (red) at No Dox, 1wk Dox, and 1wk WD; n=3-5 samples per time point as listed in Key. Islets from multiple mice were pooled to obtain adequate cells for each sample. **(D)** Pairwise correlation between all samples at all time points based on the Spearman correlation coefficient, which ranks and quantifies the degree of similarity between each pair of samples (perfect correlation=1; green). **(E)** Total number of genes for each cell type significantly up- or down-regulated (FC ≥2 or ≤-2) when comparing time points (dashed outlines): 1wk Dox vs. No Dox, 1wk WD vs. 1wk Dox, and 1wk WD vs. No Dox.

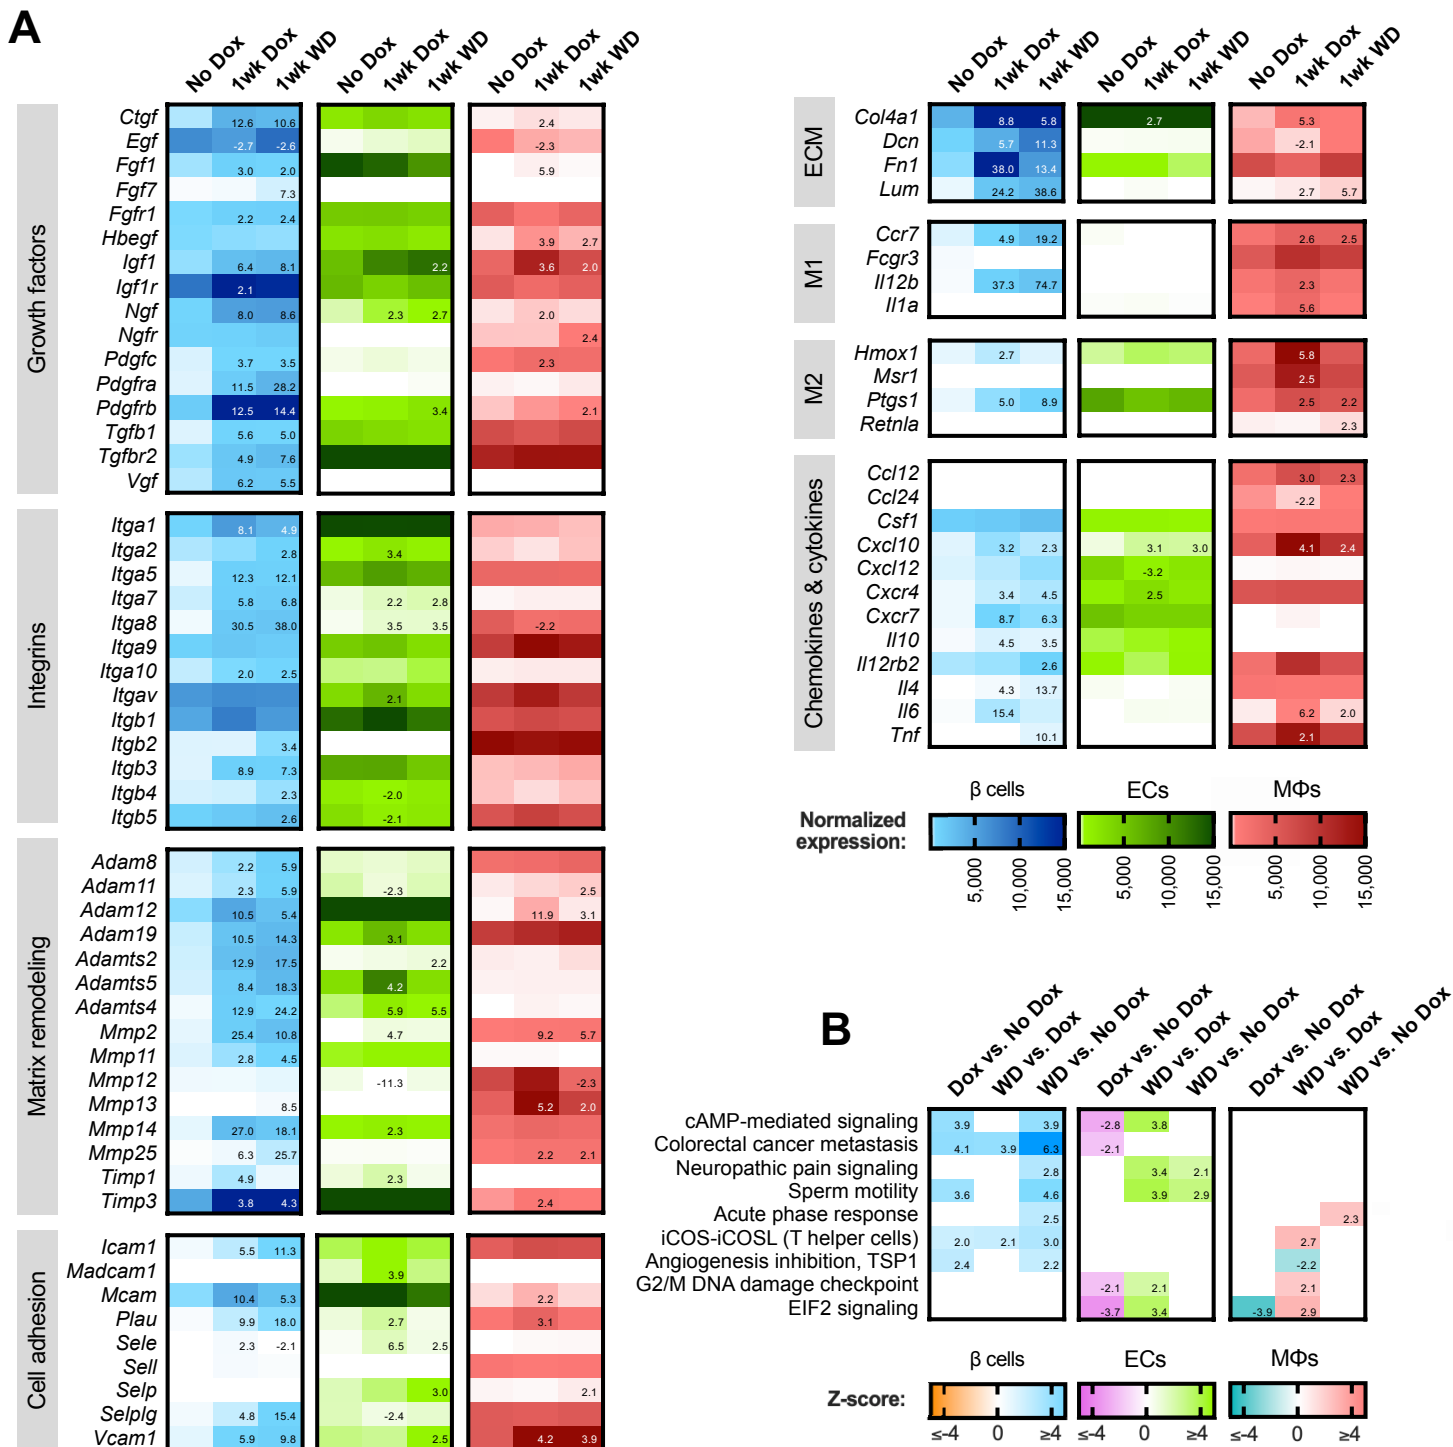

**Figure S7. Temporal changes in gene expression profiles of islet cell subpopulations by RNA-sequencing. (A)** Normalized expression of selected genes in isolated  $\beta$  cell (blue), EC (green), and M $\Phi$  (red) samples. ECM, extracellular matrix. Numbers listed on heat map in 1wk Dox and 1wk WD columns represent fold-change  $\geq 2$  or  $< -2$  ( $p < 0.05$ ) as compared to No Dox. **(B)** Ingenuity Pathway Analysis (IPA) was applied to fold-change data (1wk Dox vs. No Dox, 1wk WD vs. 1wk Dox, and 1wk WD vs. No Dox) for  $\beta$  cell, EC, and M $\Phi$  populations. Pathways showing significant regulation (z-score  $\geq 2$  or  $\leq -2$ ,  $p < 0.05$ ) in at least two cell types are shown; a full list is provided in **Table S1**. Z-scores of relevant comparisons are listed on heat map.

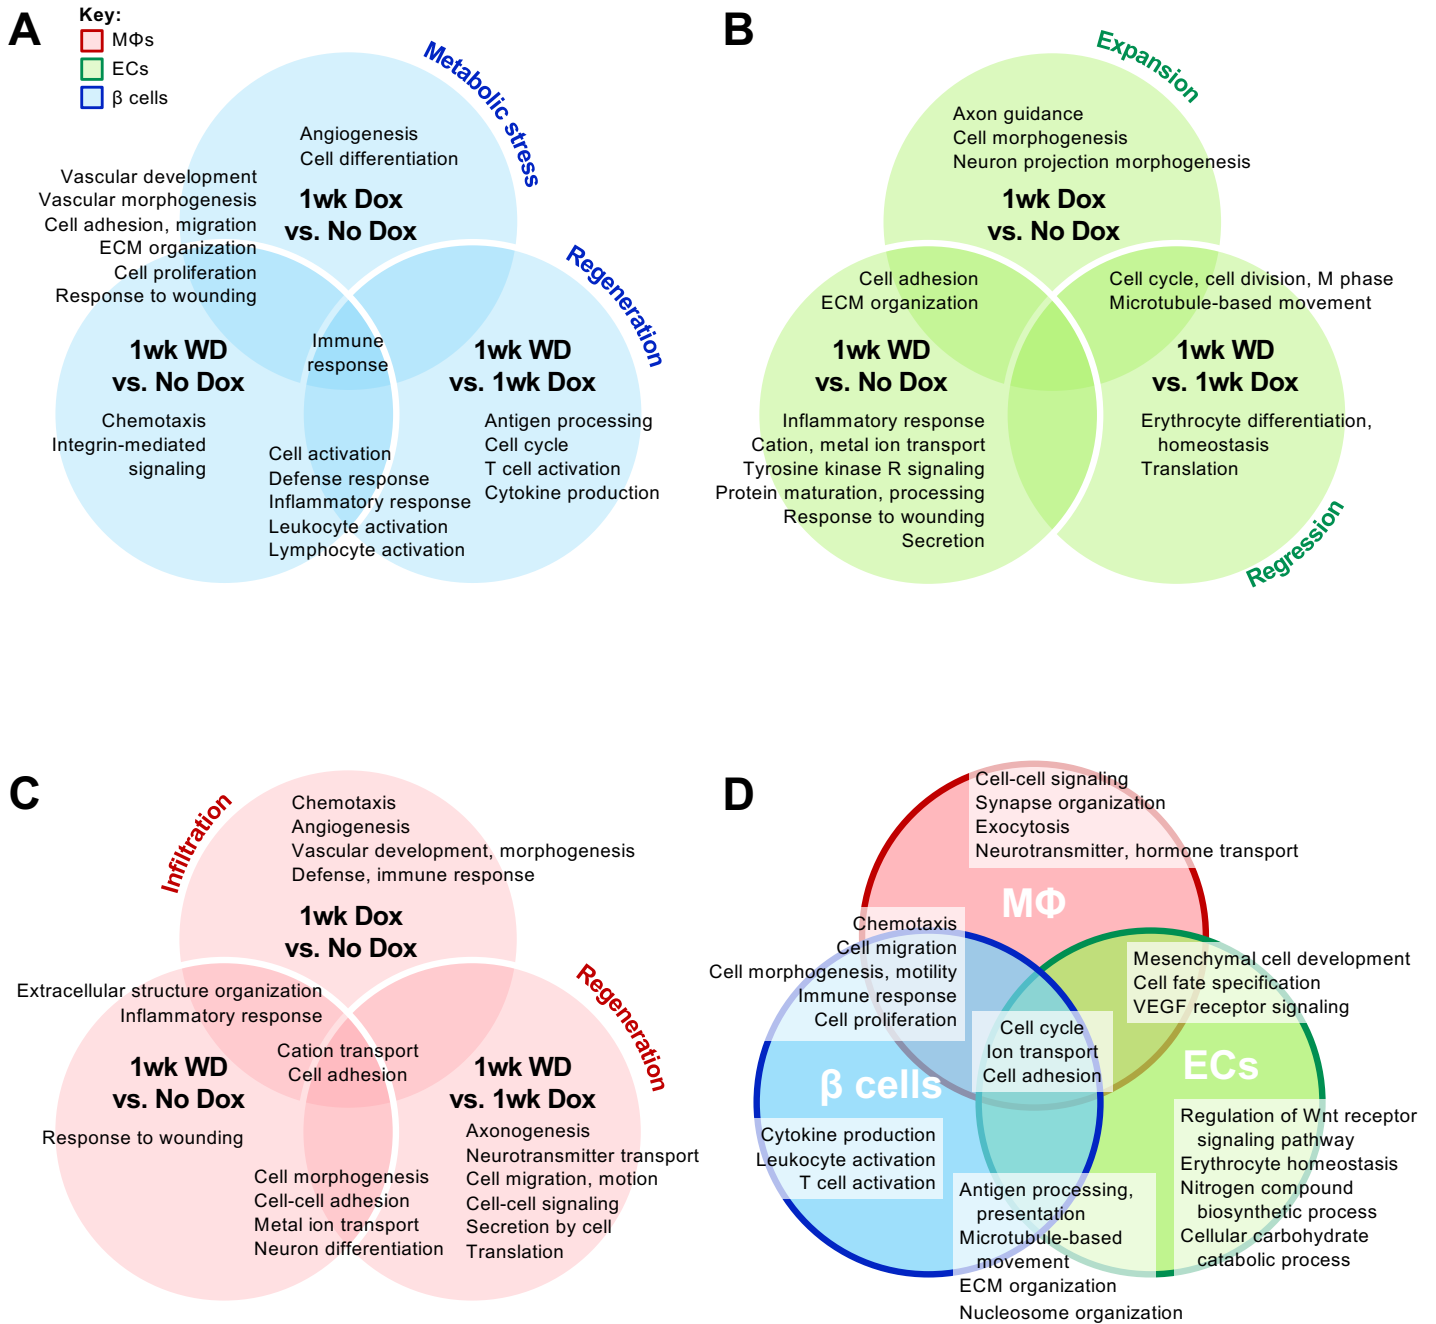

**Figure S8. Biological processes enriched in islet macrophages, endothelial cells, and β cells of βVEGF-A mice during β cell loss and recovery.** Venn diagrams showing profiles of β cells (A), endothelial cells (ECs) (B), and macrophages (MΦs) (C) as determined by Gene Ontology (GO) term analysis. Processes are organized by pairwise comparisons between time points (1wk Dox vs. No Dox, 1wk WD vs. 1wk Dox, and 1wk WD vs. No Dox), with location of text in Venn diagram accounting for processes that are represented in multiple time point comparisons. (D) Unique and shared processes of β cells, ECs, and MΦs during β cell recovery (1wk WD vs. 1wk Dox and/or 1wk WD vs. No Dox). All terms diagrammed in (A–D) appeared in top 20 hits (highest statistical significance) for the indicated population(s); those omitted due to space constraints are provided in **Table S2**.

**Table S1:** GO Terms for sorted cell populations

| Term       | Process                                                                                   | p value: | β cells  |          |          |          |          |  | ECs   |  |          |          |       |  | Macrophages |          |          |  |       |          |
|------------|-------------------------------------------------------------------------------------------|----------|----------|----------|----------|----------|----------|--|-------|--|----------|----------|-------|--|-------------|----------|----------|--|-------|----------|
|            |                                                                                           |          | G1vG0    |          | G2vG0    |          | G2vG1    |  | G1vG0 |  | G2vG0    |          | G2vG1 |  | G1vG0       |          | G2vG0    |  | G2vG1 |          |
|            |                                                                                           |          |          |          |          |          |          |  |       |  |          |          |       |  |             |          |          |  |       |          |
| GO:0000087 | M phase of mitotic cell cycle                                                             |          |          |          |          | 5.31E-09 | 1.13E-06 |  |       |  |          | 2.30E-10 |       |  |             |          |          |  |       |          |
| GO:0000278 | Mitotic cell cycle                                                                        |          |          |          |          |          | 3.29E-06 |  |       |  |          | 3.37E-10 |       |  |             |          |          |  |       |          |
| GO:0000279 | M phase                                                                                   |          |          |          | 8.80E-11 |          | 3.58E-07 |  |       |  |          | 2.60E-14 |       |  |             |          |          |  |       |          |
| GO:0000280 | Nuclear division                                                                          |          |          |          |          |          | 3.28E-06 |  |       |  |          | 1.05E-09 |       |  |             |          |          |  |       |          |
| GO:0000902 | Cell morphogenesis                                                                        |          |          |          |          |          | 6.64E-05 |  |       |  |          |          |       |  |             | 2.70E-09 | 6.23E-05 |  |       |          |
| GO:0000904 | Cell morphogenesis involved in differentiation                                            |          |          |          |          |          | 1.59E-06 |  |       |  |          |          |       |  |             | 2.25E-08 | 3.62E-04 |  |       |          |
| GO:0001501 | Skeletal system development                                                               |          | 2.97E-08 |          |          |          |          |  |       |  |          |          |       |  |             |          |          |  |       |          |
| GO:0001503 | Ossification                                                                              |          |          |          |          |          |          |  |       |  | 3.53E-04 |          |       |  | 0.002241    |          |          |  |       |          |
| GO:0001525 | Angiogenesis                                                                              |          | 7.92E-13 |          |          |          |          |  |       |  |          |          |       |  | 6.32E-05    |          |          |  |       |          |
| GO:0001568 | Blood vessel development                                                                  |          | 3.64E-21 | 9.44E-13 |          |          |          |  |       |  |          |          |       |  | 6.42E-06    |          |          |  |       |          |
| GO:0001775 | Cell activation                                                                           |          |          | 1.79E-15 |          | 1.55E-12 |          |  |       |  |          |          |       |  |             |          |          |  |       |          |
| GO:0001817 | Regulation of cytokine production                                                         |          |          |          |          | 1.57E-10 |          |  |       |  |          |          |       |  |             |          |          |  |       |          |
| GO:0001944 | Vasculature development                                                                   |          | 3.10E-22 | 1.52E-13 |          |          |          |  |       |  |          |          |       |  |             |          |          |  |       | 5.74E-06 |
| GO:0002504 | Antigen processing and presentation of peptide or polysaccharide antigen via MHC class II |          |          |          |          | 5.63E-10 |          |  |       |  |          |          |       |  |             |          |          |  |       |          |
| GO:0002526 | Acute inflammatory response                                                               |          |          |          |          |          |          |  |       |  | 6.27E-05 |          |       |  |             |          |          |  |       |          |
| GO:0002684 | Positive regulation of immune system process                                              |          |          | 1.63E-13 |          | 2.60E-13 |          |  |       |  |          |          |       |  |             |          |          |  |       |          |
| GO:0002694 | Regulation of leukocyte activation                                                        |          |          |          |          | 4.06E-09 |          |  |       |  |          |          |       |  |             |          |          |  |       |          |
| GO:0006323 | DNA packaging                                                                             |          |          |          |          |          |          |  |       |  |          | 2.18E-04 |       |  |             |          |          |  |       |          |
| GO:0006412 | Translation                                                                               |          |          |          |          |          |          |  |       |  |          | 1.06E-04 |       |  |             |          |          |  |       | 6.97E-06 |
| GO:0006811 | Ion transport                                                                             |          |          |          |          |          |          |  |       |  | 2.18E-04 |          |       |  | 5.92E-04    |          |          |  |       | 1.36E-05 |
| GO:0006812 | Cation transport                                                                          |          |          |          |          |          |          |  |       |  | 1.07E-04 |          |       |  | 4.04E-04    | 5.69E-07 |          |  |       | 9.98E-07 |
| GO:0006813 | Potassium ion transport                                                                   |          |          |          |          |          |          |  |       |  | 2.24E-04 |          |       |  |             |          |          |  |       | 3.99E-04 |
| GO:0006836 | Neurotransmitter transport                                                                |          |          |          |          |          |          |  |       |  |          |          |       |  |             |          |          |  |       | 5.17E-04 |
| GO:0006928 | Cell motion                                                                               |          |          | 1.71E-10 |          |          |          |  |       |  |          |          |       |  |             |          |          |  |       | 4.89E-04 |
| GO:0006935 | Chemotaxis                                                                                |          |          | 1.78E-11 |          |          |          |  |       |  |          |          |       |  |             |          |          |  |       |          |
| GO:0006952 | Defense response                                                                          |          |          | 1.51E-14 |          | 3.64E-11 |          |  |       |  |          |          |       |  | 0.001387    |          |          |  |       |          |
| GO:0006954 | Inflammatory response                                                                     |          |          | 2.18E-15 |          | 1.20E-09 |          |  |       |  | 2.59E-04 |          |       |  | 3.41E-06    | 4.13E-09 |          |  |       |          |



**Table S1:** GO Terms for sorted cell populations

| Term       | Process                                                                           | p value: | β cells  |          |          |       |          |       | ECs      |          |       |       |       |          | Macrophages |          |  |          |
|------------|-----------------------------------------------------------------------------------|----------|----------|----------|----------|-------|----------|-------|----------|----------|-------|-------|-------|----------|-------------|----------|--|----------|
|            |                                                                                   |          | G1vG0    | G2vG0    | G2vG1    | G1vG0 | G2vG0    | G2vG1 | G1vG0    | G2vG0    | G2vG1 | G1vG0 | G2vG0 | G2vG1    |             |          |  |          |
|            |                                                                                   |          |          |          |          |       |          |       |          |          |       |       |       |          |             |          |  |          |
| GO:0006955 | Immune response                                                                   |          | 1.35E-10 | 4.67E-22 | 6.57E-12 |       |          |       |          |          |       |       |       |          | 1.12E-10    |          |  |          |
| GO:0007017 | Microtubule-based process                                                         |          |          |          |          |       |          |       |          | 4.58E-06 |       |       |       |          |             |          |  |          |
| GO:0007018 | Microtubule-based movement                                                        |          |          |          |          |       | 1.42E-05 |       |          | 8.85E-06 |       |       |       |          |             |          |  |          |
| GO:0007049 | Cell cycle                                                                        |          |          |          | 4.50E-09 |       | 8.81E-07 |       |          | 4.02E-13 |       |       |       |          |             |          |  |          |
| GO:0007059 | Chromosome segregation                                                            |          |          |          |          |       |          |       |          | 1.61E-05 |       |       |       |          |             |          |  |          |
| GO:0007067 | Mitosis                                                                           |          |          |          |          |       | 3.28E-06 |       |          | 1.05E-09 |       |       |       |          |             |          |  |          |
| GO:0007126 | Meiosis                                                                           |          |          |          |          |       |          |       |          | 2.02E-04 |       |       |       |          |             |          |  |          |
| GO:0007155 | Cell adhesion                                                                     |          | 1.06E-28 | 4.21E-36 |          |       | 2.29E-06 |       | 6.68E-10 |          |       |       |       | 4.43E-10 | 5.82E-14    | 9.81E-11 |  |          |
| GO:0007156 | Homophilic cell adhesion                                                          |          |          |          |          |       |          |       |          |          |       |       |       |          |             |          |  | 2.75E-08 |
| GO:0007167 | Enzyme linked receptor protein signaling                                          |          |          |          |          |       |          |       | 7.97E-05 |          |       |       |       |          |             |          |  |          |
| GO:0007169 | Transmembrane receptor protein tyrosine kinase signaling pathway                  |          |          |          |          |       |          |       | 5.49E-05 |          |       |       |       |          |             |          |  |          |
| GO:0007229 | Integrin-mediated signaling pathway                                               |          |          | 2.45E-11 |          |       |          |       |          |          |       |       |       |          |             |          |  |          |
| GO:0007267 | Cell-cell signaling                                                               |          |          |          |          |       |          |       |          |          |       |       |       |          |             |          |  | 1.22E-04 |
| GO:0007409 | Axonogenesis                                                                      |          |          |          |          |       |          |       |          |          |       |       |       |          | 2.88E-07    |          |  |          |
| GO:0007411 | Axon guidance                                                                     |          |          |          |          |       | 1.55E-04 |       |          |          |       |       |       |          |             |          |  |          |
| GO:0008284 | Positive regulation of cell proliferation                                         |          | 9.84E-11 |          |          |       |          |       |          |          |       |       |       | 1.03E-06 |             |          |  |          |
| GO:0009611 | Response to wounding                                                              |          | 6.84E-09 | 8.15E-18 |          |       |          |       | 5.42E-04 |          |       |       |       | 2.09E-07 | 3.20E-09    |          |  |          |
| GO:0015672 | Monovalent inorganic cation transport                                             |          |          |          |          |       |          |       | 4.95E-04 |          |       |       |       | 8.12E-04 |             | 3.65E-06 |  |          |
| GO:0016337 | Cell-cell adhesion                                                                |          |          |          |          |       |          |       |          |          |       |       |       |          | 1.17E-06    | 4.44E-06 |  |          |
| GO:0016477 | Cell migration                                                                    |          | 1.65E-08 |          |          |       |          |       |          |          |       |       |       |          |             | 7.82E-04 |  |          |
| GO:0016485 | Protein processing                                                                |          |          |          |          |       |          |       | 5.36E-05 |          |       |       |       |          |             |          |  |          |
| GO:0019886 | Antigen processing and presentation of exogenous peptide antigen via MHC class II |          |          |          | 1.18E-08 |       |          |       |          |          |       |       |       |          |             |          |  |          |
| GO:0022402 | Cell cycle process                                                                |          |          |          |          |       | 1.05E-06 |       |          | 2.12E-13 |       |       |       |          |             |          |  |          |
| GO:0022403 | Cell cycle phase                                                                  |          |          |          | 2.53E-09 |       | 1.90E-07 |       |          | 5.16E-15 |       |       |       |          |             |          |  |          |
| GO:0022610 | Biological adhesion                                                               |          | 1.32E-28 | 5.59E-36 |          |       | 2.52E-06 |       | 7.21E-10 |          |       |       |       | 4.92E-10 | 6.46E-14    | 1.07E-10 |  |          |
| GO:0030001 | Metal ion transport                                                               |          |          |          |          |       |          |       | 2.34E-05 |          |       |       |       |          | 1.93E-08    | 2.25E-06 |  |          |

**Table S1:** GO Terms for sorted cell populations

| Term       | Process                                               | p value: | β cells  |          |       |       | ECs      |          |          |          | Macrophages |          |          |          |          |
|------------|-------------------------------------------------------|----------|----------|----------|-------|-------|----------|----------|----------|----------|-------------|----------|----------|----------|----------|
|            |                                                       |          | G1vG0    | G2vG0    | G2vG1 | G1vG0 | G2vG0    | G2vG1    | G1vG0    | G2vG0    | G2vG1       | G1vG0    | G2vG0    | G2vG1    |          |
| GO:0030030 | Cell projection organization                          |          |          |          |       |       |          |          |          |          |             |          | 9.33E-07 |          |          |
| GO:0030155 | Regulation of cell adhesion                           | 5.67E-10 |          |          |       |       |          |          |          |          |             |          |          |          |          |
| GO:0030182 | Neuron differentiation                                |          |          |          |       |       |          |          |          |          |             |          | 3.32E-08 | 9.99E-04 |          |
| GO:0030198 | Extracellular matrix organization                     | 1.11E-13 | 1.62E-11 |          |       |       |          |          |          | 6.79E-04 |             |          |          |          |          |
| GO:0030218 | Erythrocyte differentiation                           |          |          |          |       |       |          |          |          |          | 9.14E-04    |          |          |          |          |
| GO:0031175 | Neuron projection development                         |          |          |          |       |       |          |          |          |          |             |          | 1.48E-07 |          |          |
| GO:0032940 | Secretion by cell                                     |          |          |          |       |       |          |          |          | 2.48E-04 |             |          |          |          | 8.57E-04 |
| GO:0032989 | Cellular component morphogenesis                      |          |          |          |       |       |          |          | 1.22E-04 |          |             |          | 3.34E-08 | 6.10E-04 |          |
| GO:0032990 | Cell part morphogenesis                               |          |          |          |       |       |          |          |          |          |             |          | 2.09E-07 |          |          |
| GO:0034101 | Erythrocyte homeostasis                               |          |          |          |       |       |          |          |          |          | 5.06E-04    |          |          |          |          |
| GO:0035295 | Tube development                                      | 7.39E-09 |          |          |       |       |          |          |          |          |             |          |          |          |          |
| GO:0042127 | Regulation of cell proliferation                      | 1.27E-14 | 7.62E-13 |          |       |       |          |          |          |          |             |          | 8.49E-07 |          |          |
| GO:0042330 | Taxis                                                 |          |          | 1.78E-11 |       |       |          |          |          |          |             | 0.001387 |          |          |          |
| GO:0043062 | Extracellular structure organization                  | 2.74E-10 | 5.05E-11 |          |       |       | 1.18E-04 |          |          |          |             | 0.001091 | 1.38E-06 |          |          |
| GO:0044057 | Regulation of system process                          |          |          |          |       |       |          | 7.29E-04 |          |          |             |          |          |          |          |
| GO:0045321 | Leukocyte activation                                  |          | 4.48E-15 | 3.83E-12 |       |       |          |          |          |          |             |          |          |          |          |
| GO:0045597 | Positive regulation of cell differentiation           | 2.62E-08 |          |          |       |       |          |          |          |          |             |          |          |          |          |
| GO:0045765 | Regulation of angiogenesis                            | 3.60E-08 |          |          |       |       |          |          |          |          |             |          |          |          |          |
| GO:0045785 | Positive regulation of cell adhesion                  | 1.37E-08 |          |          |       |       |          |          |          |          |             |          |          |          |          |
| GO:0046649 | Lymphocyte activation                                 |          | 3.34E-12 | 3.00E-10 |       |       |          |          |          | 7.69E-05 |             |          |          |          |          |
| GO:0046903 | Secretion                                             |          |          |          |       |       |          |          |          |          |             |          |          |          |          |
| GO:0048285 | Organelle fission                                     |          |          |          |       |       | 9.66E-06 |          |          |          |             |          |          |          |          |
| GO:0048514 | Blood vessel morphogenesis                            | 7.41E-20 | 2.09E-12 |          |       |       |          |          |          |          |             | 4.47E-05 |          |          |          |
| GO:0048666 | Neuron development                                    |          |          |          |       |       |          |          |          |          |             |          | 8.58E-09 |          |          |
| GO:0048667 | Cell morphogenesis involved in neuron differentiation |          |          |          |       |       | 5.62E-05 |          |          |          |             |          | 1.10E-08 |          |          |
| GO:0048812 | Neuron projection morphogenesis                       |          |          |          |       |       | 2.34E-04 |          |          |          |             |          | 1.70E-07 |          |          |
| GO:0048858 | Cell projection morphogenesis                         |          |          |          |       |       |          |          |          |          |             |          | 5.79E-08 | 7.17E-04 |          |

**Table S1:** GO Terms for sorted cell populations

| Term       | Process                                      | p value: | β cells  |       |          | ECs   |          |       | Macrophages |          |       |          |  |  |
|------------|----------------------------------------------|----------|----------|-------|----------|-------|----------|-------|-------------|----------|-------|----------|--|--|
|            |                                              |          | G1vG0    | G2vG0 | G2vG1    | G1vG0 | G2vG0    | G2vG1 | G1vG0       | G2vG0    | G2vG1 |          |  |  |
| GO:0050863 | Regulation of T cell activation              |          |          |       | 6.50E-09 |       |          |       |             |          |       |          |  |  |
| GO:0050865 | Regulation of cell activation                |          |          |       | 1.74E-09 |       |          |       |             |          |       |          |  |  |
| GO:0050867 | Positive regulation of cell activation       |          |          |       | 4.69E-09 |       |          |       |             |          |       |          |  |  |
| GO:0050870 | Positive regulation of T cell activation     |          |          |       | 4.71E-11 |       |          |       |             |          |       |          |  |  |
| GO:0051094 | Positive regulation of developmental process |          | 3.48E-09 |       |          |       |          |       |             |          |       |          |  |  |
| GO:0051249 | Regulation of lymphocyte activation          |          |          |       | 6.63E-09 |       |          |       |             |          |       |          |  |  |
| GO:0051301 | Cell division                                |          |          |       |          |       | 5.30E-06 |       |             | 8.55E-10 |       |          |  |  |
| GO:0051321 | Meiotic cell cycle                           |          |          |       |          |       |          |       |             | 2.82E-04 |       |          |  |  |
| GO:0051327 | M phase of meiotic cell cycle                |          |          |       |          |       |          |       |             | 2.02E-04 |       |          |  |  |
| GO:0051604 | Protein maturation                           |          |          |       |          |       |          |       | 1.15E-04    |          |       |          |  |  |
| GO:0051605 | Protein maturation by peptide bond cleavage  |          |          |       |          |       |          |       | 4.52E-06    |          |       |          |  |  |
| GO:0060348 | Bone development                             |          |          |       |          |       |          |       |             |          |       | 0.001779 |  |  |

**Table S2:** Mouse strains utilized in experimental models

| Abbreviation            | MGI Nomenclature or Strain Name | References                                                                                |
|-------------------------|---------------------------------|-------------------------------------------------------------------------------------------|
| Cd5-CreER               | Tg(Cdh5-cre/ERT2)#Ykub          | Okabe <i>et al.</i> , 2014 <sup>22</sup>                                                  |
| MIP-GFP                 | B6.Cg-Tg(Ins1-EGFP)1Hara/J      | Hara <i>et al.</i> , 2003 <sup>90</sup>                                                   |
| RIP-rtTA                | Tg(Ins2-rtTA)2Efr               | Milo-Landesman <i>et al.</i> , 2001 <sup>88</sup>                                         |
| TetO-VEGF               | n/a                             | Efrat <i>et al.</i> , 1995 <sup>87</sup> ; Ohno-Matsui <i>et al.</i> , 2002 <sup>89</sup> |
| VEGFR2 <sup>fl/fl</sup> | Kdr <sup>tm2Sato</sup>          | Hooper <i>et al.</i> , 2009 <sup>98</sup>                                                 |

**Table S3:** Breeding scheme to generate  $\beta$ VEGF-A; VEGFR2<sup>iΔEC</sup> mice

| Cross | Male breeder                                                                   | Female breeder                                        | Desired Offspring                                                                                           | Frequency |
|-------|--------------------------------------------------------------------------------|-------------------------------------------------------|-------------------------------------------------------------------------------------------------------------|-----------|
| A1    | Cd5-CreER <sup>tg/+</sup>                                                      | VEGFR2 <sup>fl/fl</sup>                               | Cd5-CreER <sup>tg/+</sup> ; VEGFR2 <sup>fl/+</sup>                                                          | 50%       |
| A2    | Cd5-CreER <sup>tg/+</sup> ; VEGFR2 <sup>fl/+</sup>                             | VEGFR2 <sup>fl/fl</sup>                               | Cd5-CreER <sup>tg/+</sup> ; VEGFR2 <sup>fl/fl</sup>                                                         | 25%       |
| A3    | Cd5-CreER <sup>tg/+</sup> ; VEGFR2 <sup>fl/fl</sup>                            | RIP-rtTA <sup>tg/tg</sup>                             | Cd5-CreER <sup>tg/+</sup> ; VEGFR2 <sup>fl/+</sup> ; RIP-rtTA <sup>tg/+</sup>                               | 50%       |
| A4    | Cd5-CreER <sup>tg/+</sup> ; VEGFR2 <sup>fl/+</sup> ; RIP-rtTA <sup>tg/+</sup>  | VEGFR2 <sup>fl/fl</sup>                               | Cd5-CreER <sup>tg/+</sup> ; VEGFR2 <sup>fl/fl</sup> ; RIP-rtTA <sup>tg/+</sup>                              | 12.5%     |
| B1    | VEGFR2 <sup>fl/fl</sup>                                                        | TetO-VEGFA <sup>tg/tg</sup>                           | TetO-VEGFA <sup>tg/+</sup> ; VEGFR2 <sup>fl/+</sup>                                                         | 100%      |
| B2    | TetO-VEGFA <sup>tg/+</sup> ; VEGFR2 <sup>fl/+</sup>                            | TetO-VEGFA <sup>tg/tg</sup>                           | TetO-VEGFA <sup>tg/tg</sup> ; VEGFR2 <sup>fl/+</sup>                                                        | 50%       |
| B3    | TetO-VEGFA <sup>tg/+</sup> ; VEGFR2 <sup>fl/+</sup>                            | TetO-VEGFA <sup>tg/tg</sup> ; VEGFR2 <sup>fl/+</sup>  | TetO-VEGFA <sup>tg/tg</sup> ; VEGFR2 <sup>fl/fl</sup>                                                       | 25%       |
| C1    | Cd5-CreER <sup>tg/+</sup> ; VEGFR2 <sup>fl/fl</sup> ; RIP-rtTA <sup>tg/+</sup> | TetO-VEGFA <sup>tg/tg</sup> ; VEGFR2 <sup>fl/fl</sup> | TetO-VEGFA <sup>tg/+</sup> ; Cd5-CreER <sup>tg/+</sup> ; VEGFR2 <sup>fl/fl</sup> ; RIP-rtTA <sup>tg/+</sup> | 25%       |

**Table S4:** PCR primers and conditions for genotyping

| Gentotype               | Primers                                                                                                                                                                                   | PCR Conditions                                                                                                                                        | Product(s)                                          |
|-------------------------|-------------------------------------------------------------------------------------------------------------------------------------------------------------------------------------------|-------------------------------------------------------------------------------------------------------------------------------------------------------|-----------------------------------------------------|
| Cd5-CreER               | 5'- GCG GTC TGG CAG TAA AAA CTA TC -3'<br>3'- TT CAC TGT CGT TAC GAC AAA GTG -5'                                                                                                          | 93°C 3'<br>-----<br>93°C 20"<br>60°C 20" 30 cycles<br>72°C 45"<br>-----<br>72°C 5'<br>4°C hold                                                        | 100 bp                                              |
| MIP-GFP                 | 5'- AAG TTC ATC TGC ACC ACC G -3' (GFP)<br>3'- GC GTG GTA GAA GAA GTT CCT -5' (GFP)<br><br>5'- CTA GGC CAC AGA ATT GAA AGA TCT -3' (IC)<br>3'- C CTA CTA CGA TCT TAA AGG TGG ATG -5' (IC) | 94°C 1.5'<br>-----<br>94°C 30"<br>60°C 1" 35 cycles<br>72°C 1"<br>-----<br>72°C 2'<br>4°C hold                                                        | 173 bp (GFP)<br>324 bp (IC)                         |
| RIP-rtTA                | 5'- GTG AAG TGG GTC CGC GTA CAG -3'<br>3'- CTA CGG GAA CCT TAA CTG CTC ATG -5'                                                                                                            | 92°C 2'<br>-----<br>94°C 30"<br>57°C 30" 30 cycles<br>72°C 30"<br>-----<br>72°C 10'<br>4°C hold                                                       | 400 bp                                              |
| TetO-VEGF               | 5'- TCG AGT AGG CGT GTA CGG -3'<br>3'- GCT ACG CCC CCG ACG ACG -5'                                                                                                                        | 95°C 4'<br>-----<br>95°C 1'<br>57°C 30" 29 cycles<br>72°C 1"<br>-----<br>72°C 10'<br>4°C hold                                                         | 420 bp                                              |
| VEGFR2 <sup>fl/fl</sup> | 5' - CCA CAG AAC AAC TCA GGG CTA - 3'<br>3'- AA AGG TCT CTG AAA CGA GGG -5'                                                                                                               | 94°C 2'<br>-----<br>94°C 20"<br>65°C 15" 10 cycles<br>68°C 10"<br>-----<br>94°C 15"<br>60°C 15" 28 cycles<br>72°C 10"<br>-----<br>72°C 1'<br>4°C hold | 179 bp (VEGFR2)<br>230 bp (VEGFR2 <sup>loxP</sup> ) |

GFP, green fluorescent protein; IC, internal control

**Table S5:** Antibodies used for immunohistochemistry and flow cytometry

| Antigen/Conjugate    | Species    | Source                 | Catalog #   | Application | Dilution        |
|----------------------|------------|------------------------|-------------|-------------|-----------------|
| Caveolin-1           | Rabbit     | Abcam                  | ab2910      | IHC (1°)    | 1:2000          |
| CD11b – APC          | Rat        | BD Pharmingen          | 561690      | FC          | 1:100,<br>1:500 |
| CD206 (Mrc1)         | Rat        | BioLegend              | 141701      | IHC (1°)    | 1:500           |
| CD31                 | Rat        | BD Pharmingen          | 553370      | IHC (1°)    | 1:100           |
| CD31 – PE            | Rat        | BD Pharmingen          | 561073      | FC          | 1:500           |
| CD45 – PE            | Rat        | BD Pharmingen          | 561087      | FC          | 1:500           |
| Col-IV               | Rabbit     | Abcam                  | ab6586      | IHC (1°)    | 1:1000          |
| Goat IgG – Cy3       | Donkey     | Jackson Immunoresearch | 705-165-147 | IHC (2°)    | 1:500           |
| Guinea pig IgG – Cy2 | Donkey     | Jackson Immunoresearch | 706-225-148 | IHC (2°)    | 1:500           |
| Guinea pig IgG – Cy5 | Donkey     | Jackson Immunoresearch | 706-175-148 | IHC (2°)    | 1:200           |
| Iba1                 | Rabbit     | Wako                   | 019-19741   | IHC (1°)    | 1:500           |
| Iba1                 | Rabbit     | Abcam                  | ab221790    | IHC (1°)    | 1:1000          |
| Insulin              | Guinea pig | Dako                   | A0564       | IHC (1°)    | 1:1000          |
| Insulin              | Guinea pig | Cell Marque            | 273A-15     | IHC (1°)    | 1:500           |
| Ki67                 | Rabbit     | Abcam                  | ab15580     | IHC (1°)    | 1:5000          |
| Ly6G-FITC            | Rat        | BD Pharmingen          | 551460      | FC          | 1:500           |
| pERK                 | Rabbit     | Cell Signaling         | 4370        | IHC (1°)    | 1:200           |
| Rabbit IgG – Cy2     | Donkey     | Jackson Immunoresearch | 711-225-152 | IHC (2°)    | 1:500           |
| Rabbit IgG – Cy3     | Donkey     | Jackson Immunoresearch | 711-165-152 | IHC (2°)    | 1:500           |
| Rat IgG – Cy2        | Donkey     | Jackson Immunoresearch | 712-225-153 | IHC (2°)    | 1:500           |
| VEGF-A               | Goat       | R&D Systems            | AF564       | IHC (1°)    | 1:200           |
| VEGFR2               | Goat       | R&D Systems            | AF644       | IHC (1°)    | 1:2000          |

1°, primary antibody; 2°, secondary antibody; FC, flow cytometry; IHC, immunohistochemistry
